# Supplementary material for: “One-pot” access to dihydrofurans via tandem oxidative difunctionalization and ring contraction of aminopyrans
Source: Royal Society of Chemistry journal article supplement (doi:10.1039/c4ob00324a), 2014-01-01
Supplement: c4ob00324a1.pdf [file c4ob00324a1.pdf]

# **“One-Pot” Access to Dihydrofurans *via* Tandem Oxidative Difunctionalization and Ring Contraction of Aminopyrans**

*Santhosh Reddy Mandha,<sup>a</sup> Manjula Alla, <sup>\*,a</sup> Jagadeesh Babu Nanubolu,<sup>b</sup>*

<sup>a</sup> Crop Protection Chemicals, <sup>b</sup> Laboratory of X-ray Crystallography, CSIR-Indian Institute of  
Chemical Technology, Hyderabad 500607, India.

*manjula@iict.res.in*

---

## **Supporting information**

1. <sup>1</sup>H & <sup>13</sup>C NMR spectral copies [S-2 to S-28]
2. Deuterium exchange PMR spectra of ‘**3e**’ [S-29]
3. X-ray crystallography data for ‘**3h**’ and ‘**6**’ [S-30 to S-32]
4. References [S-33]

# <sup>1</sup>H & <sup>13</sup>C NMR Spectral copies

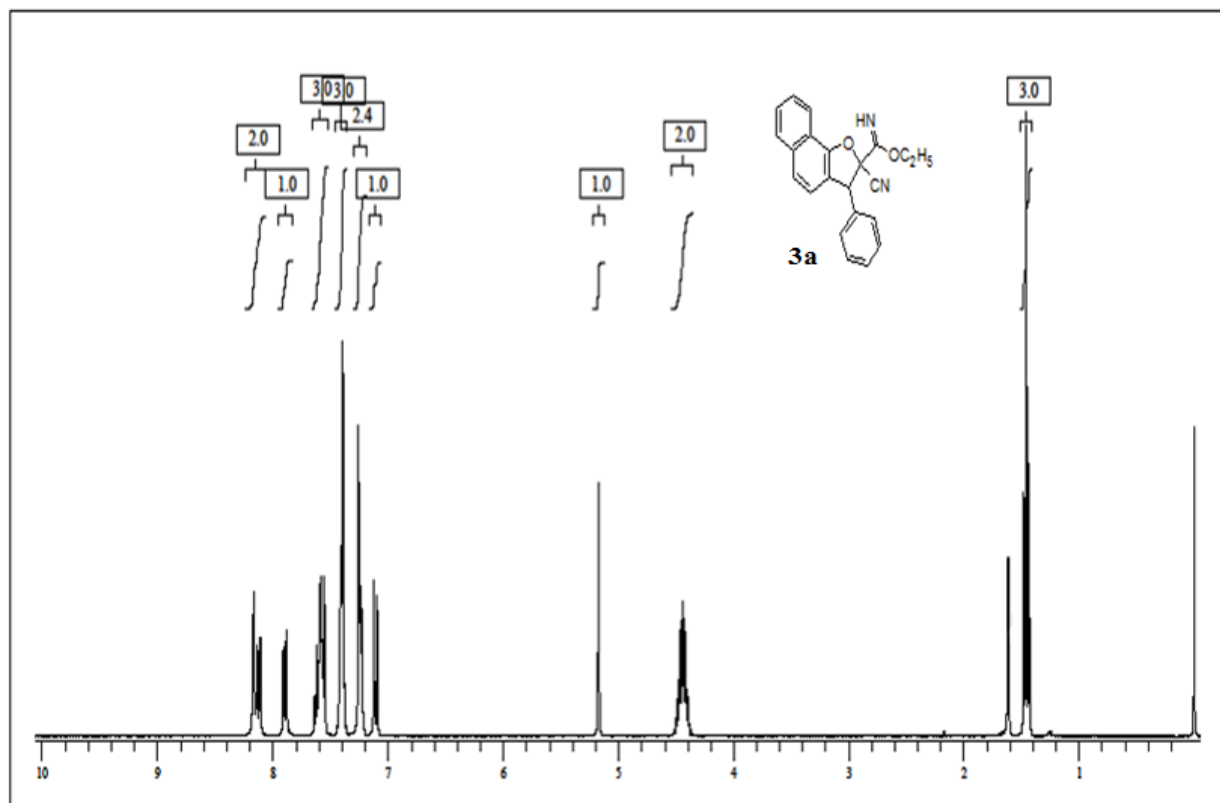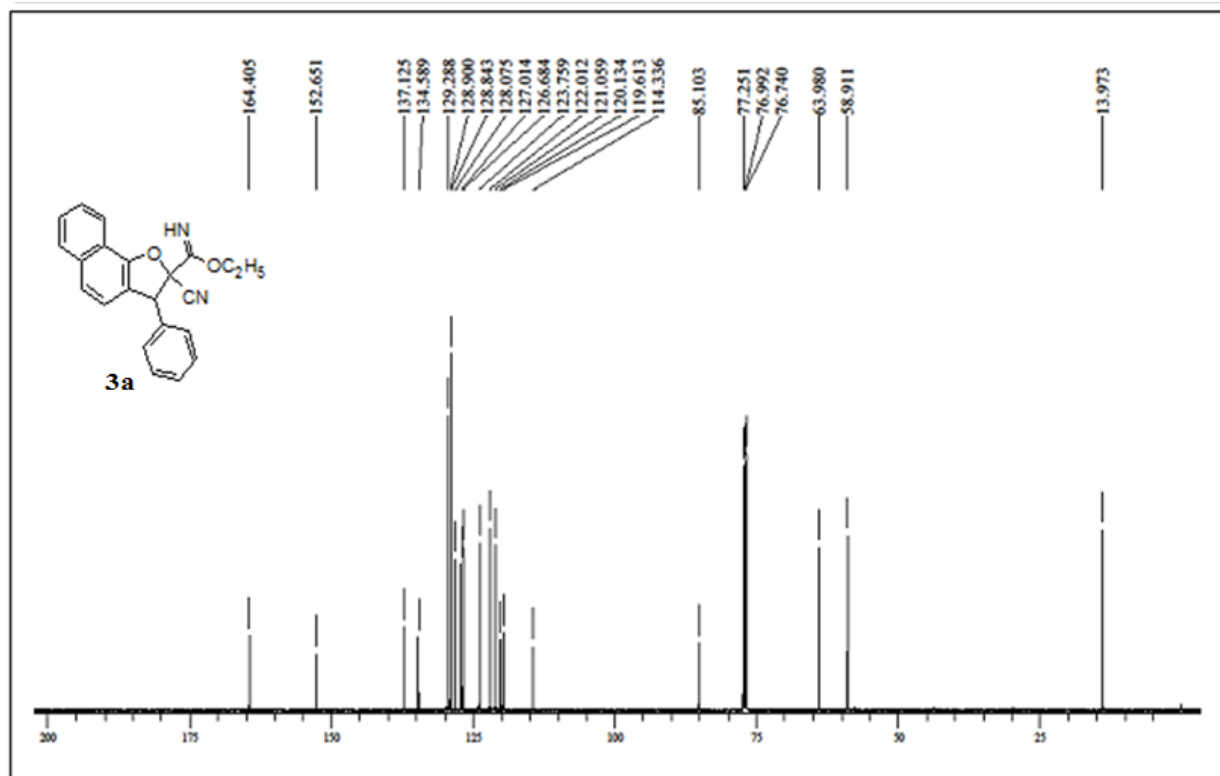

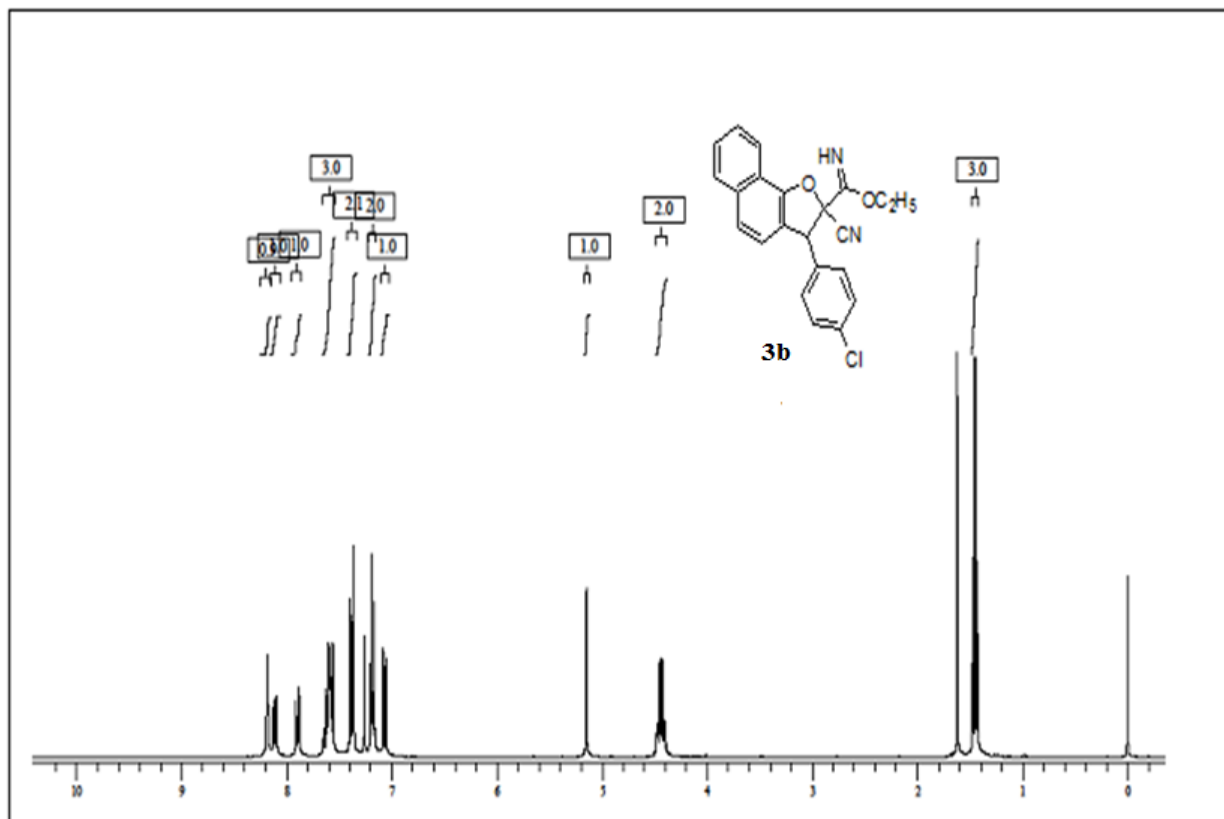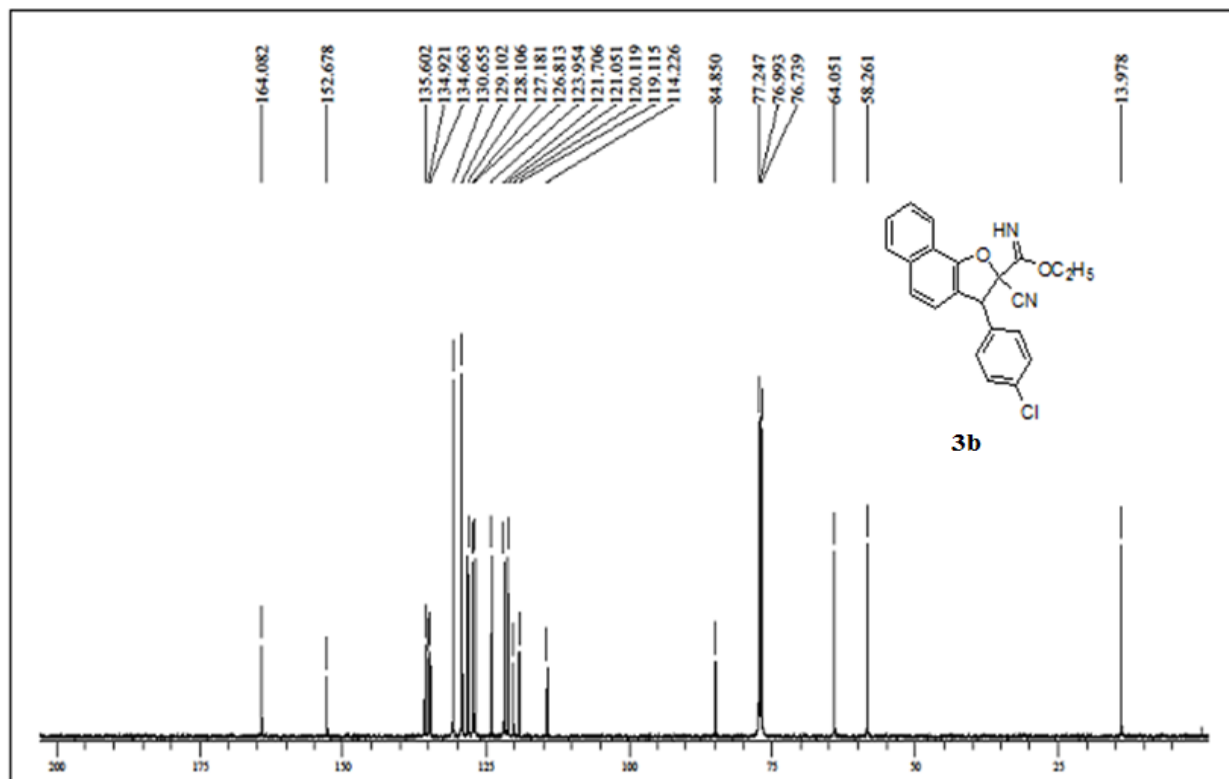



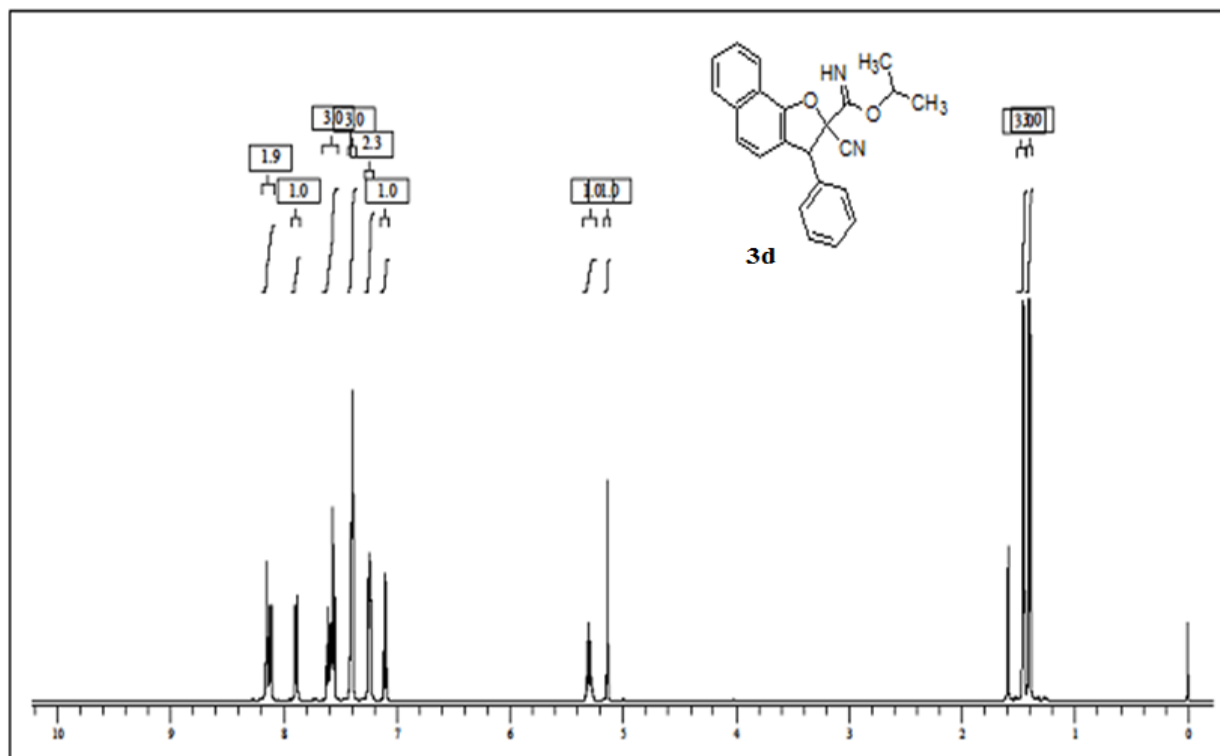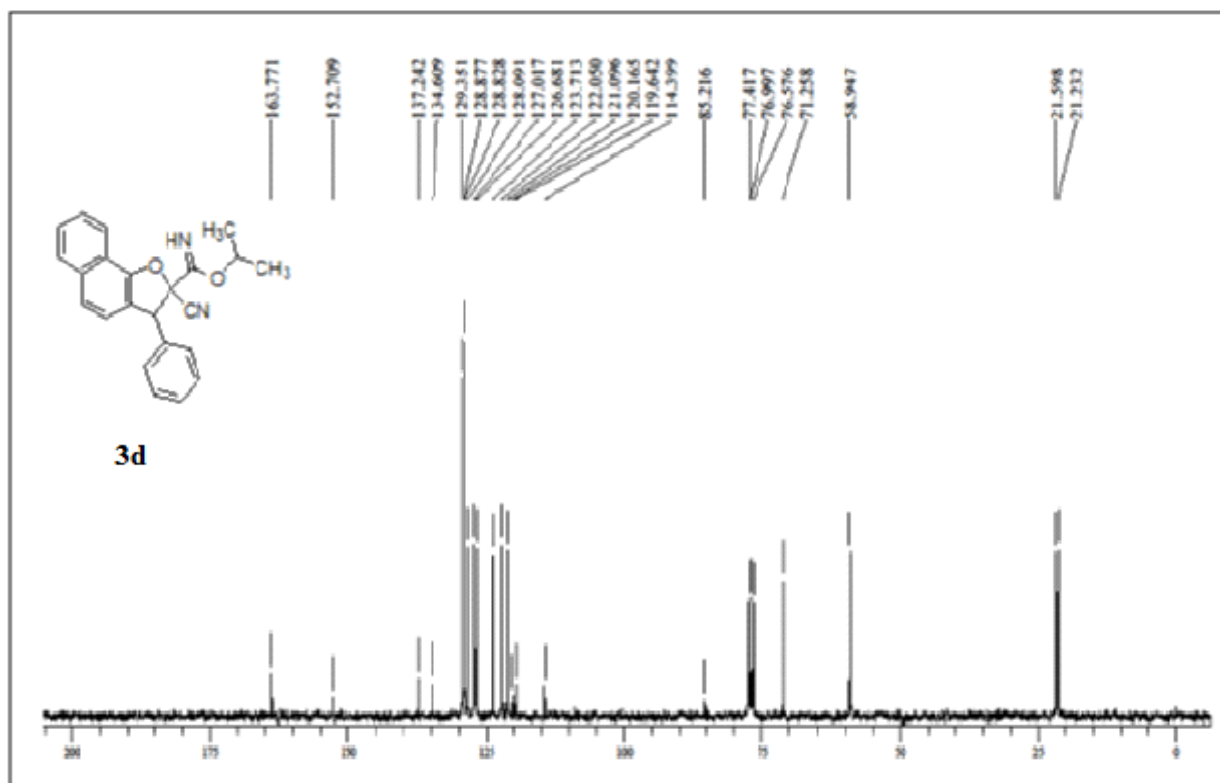



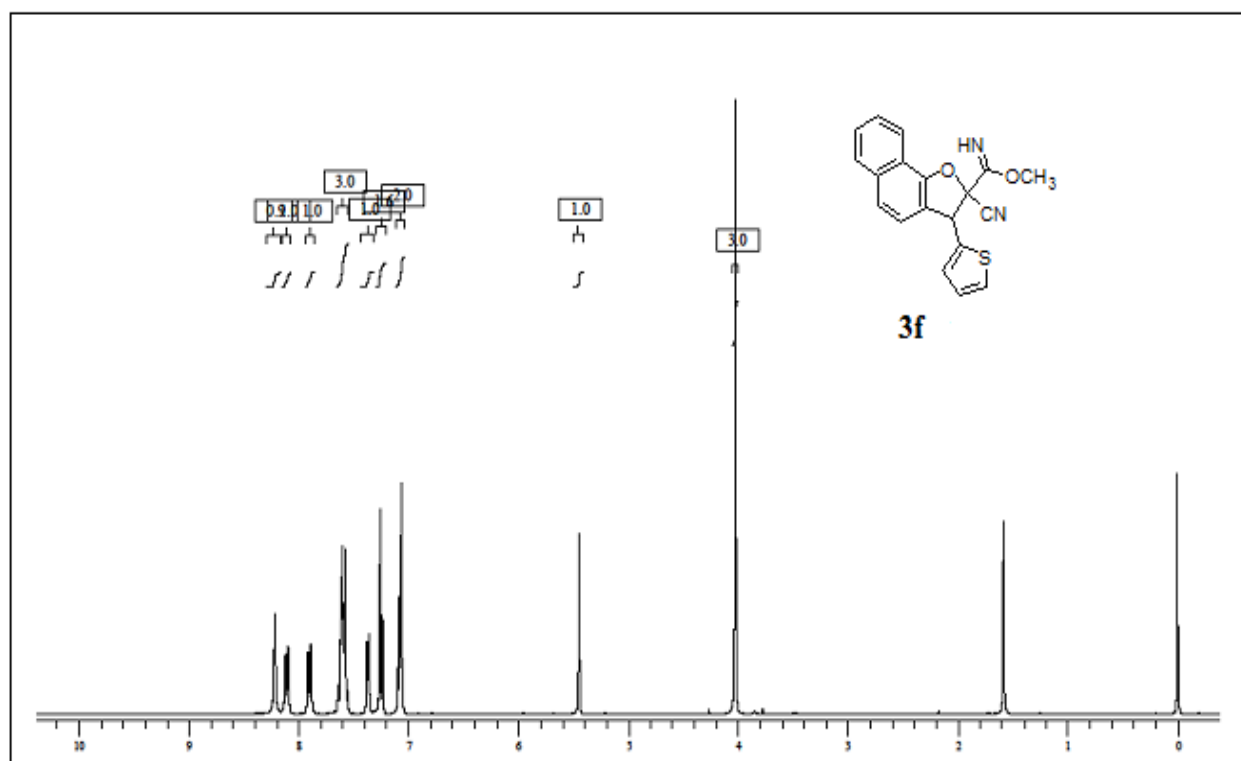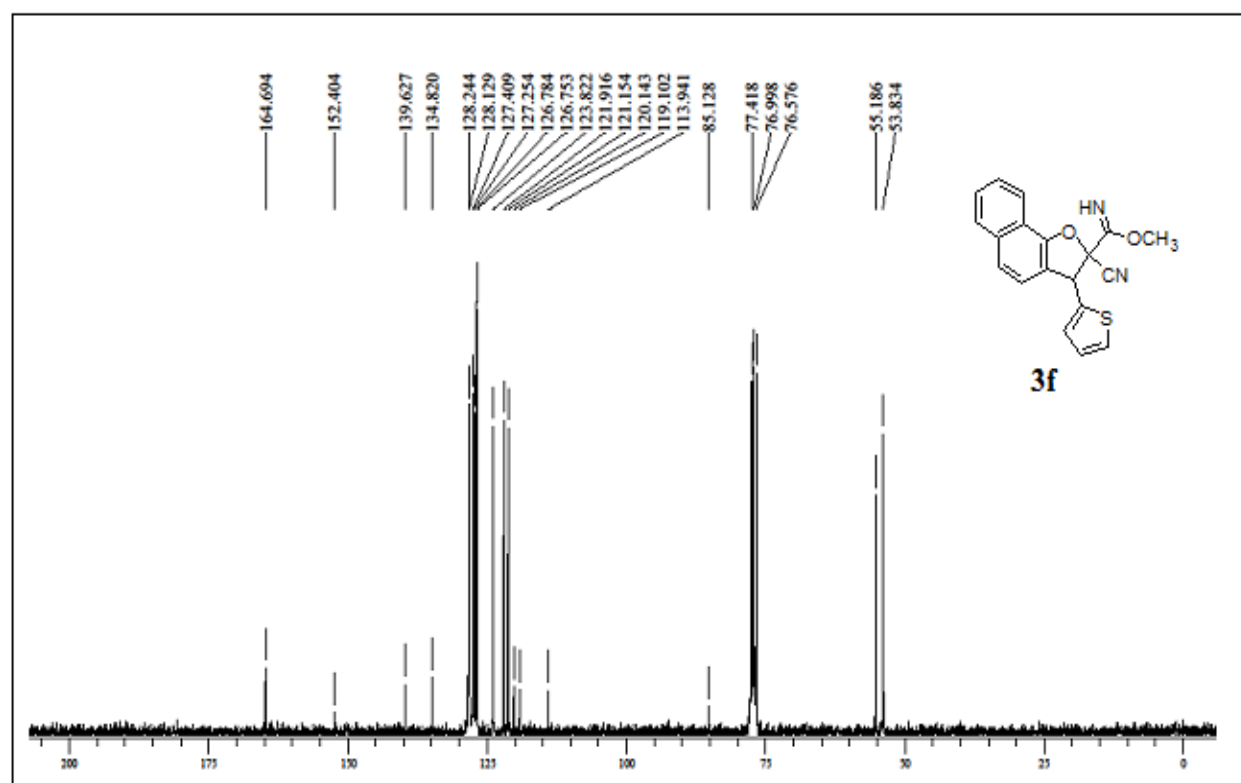

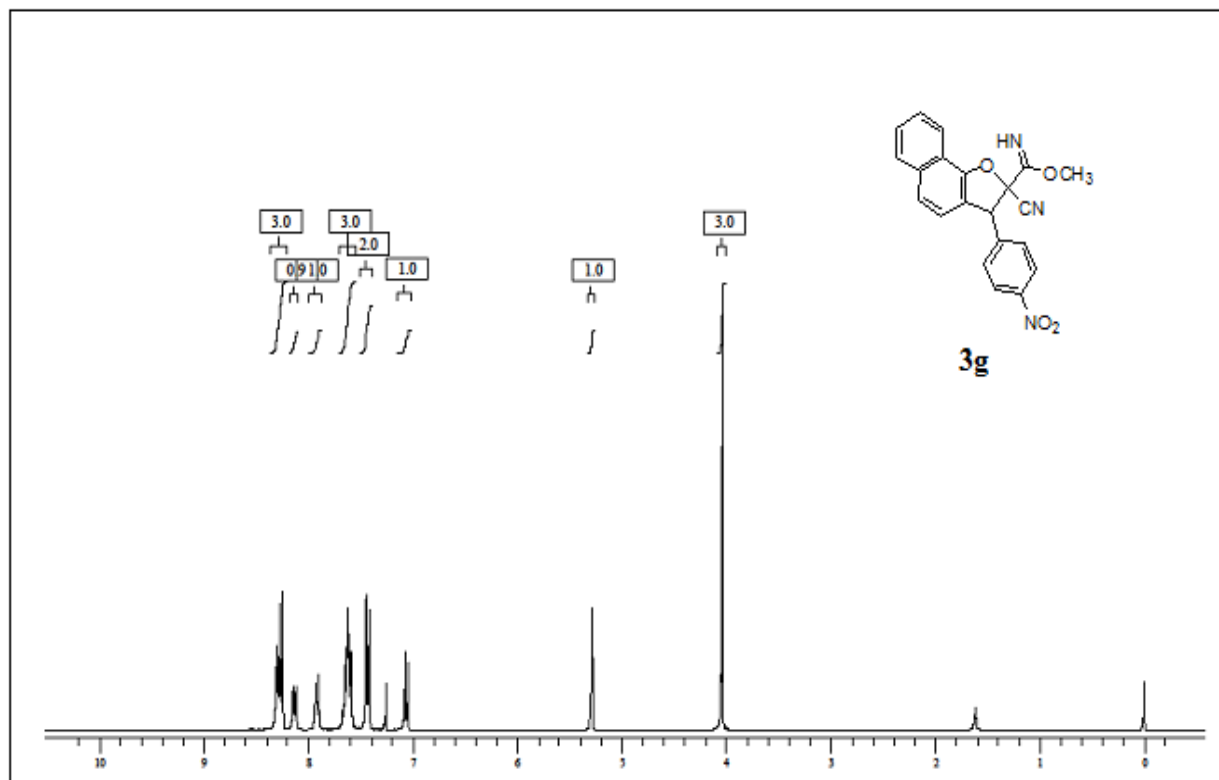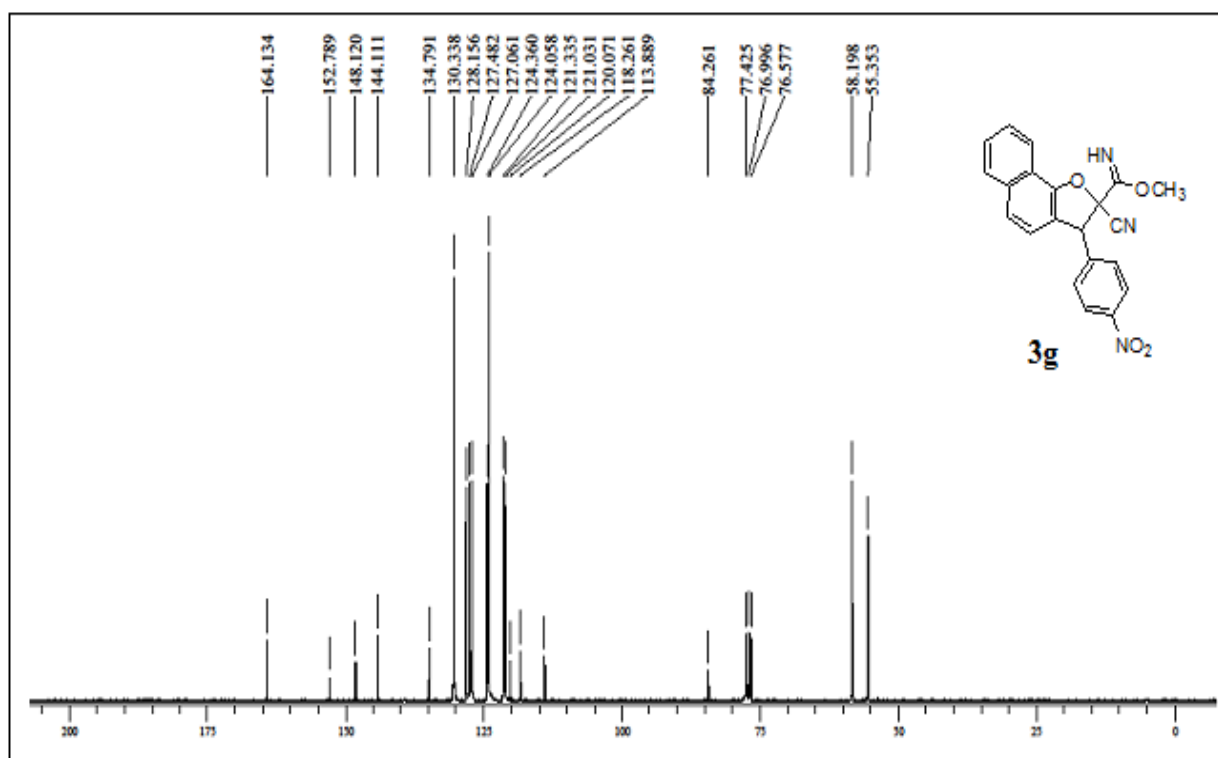

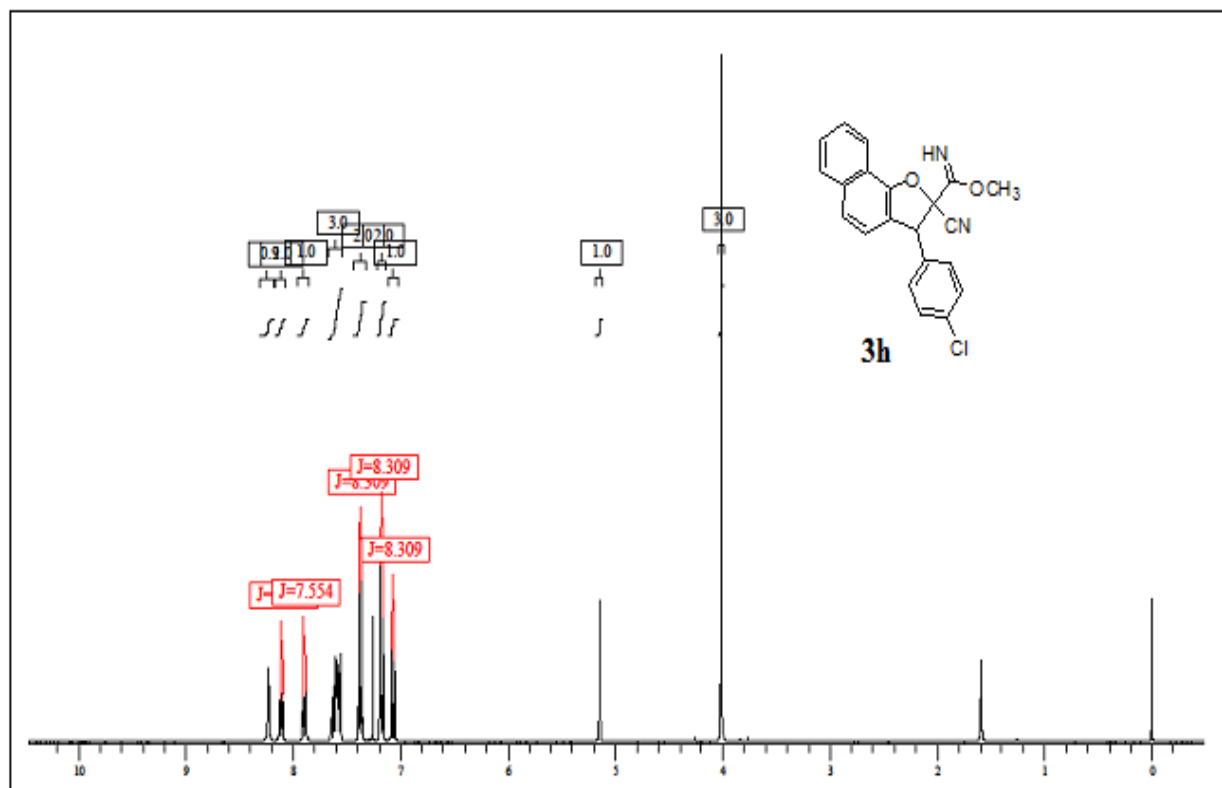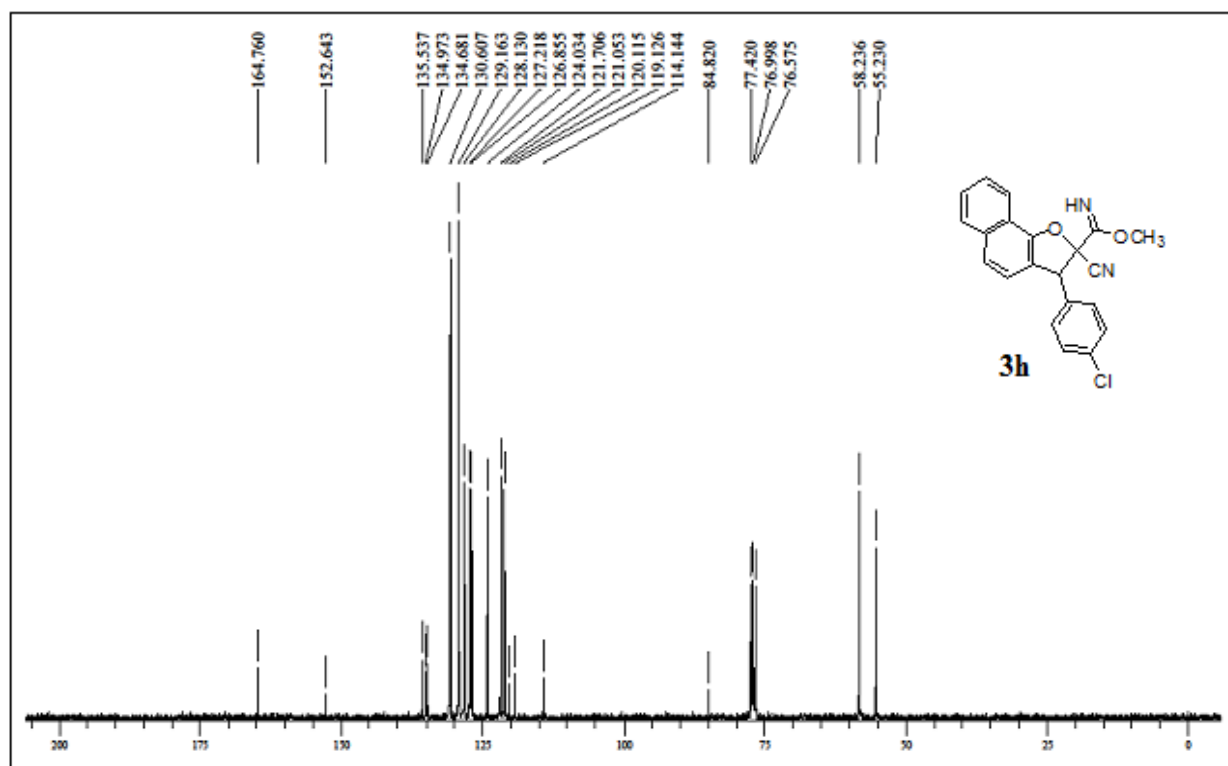

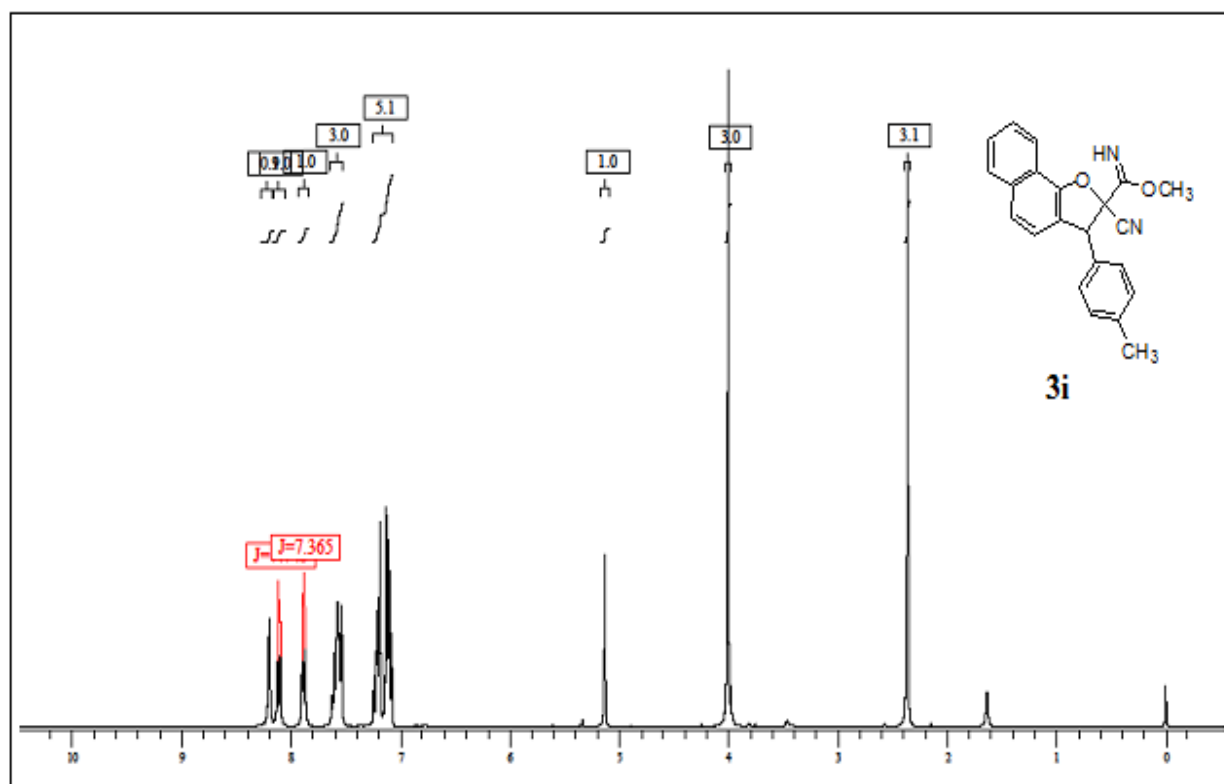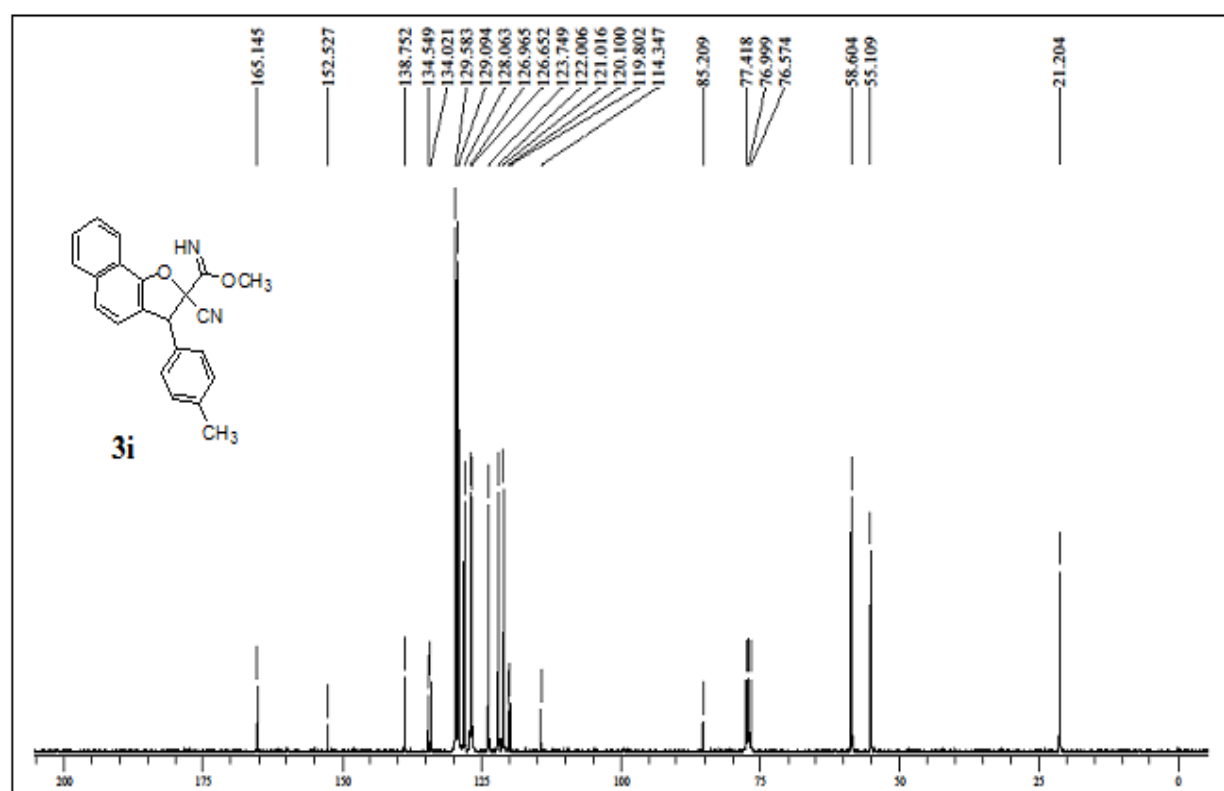

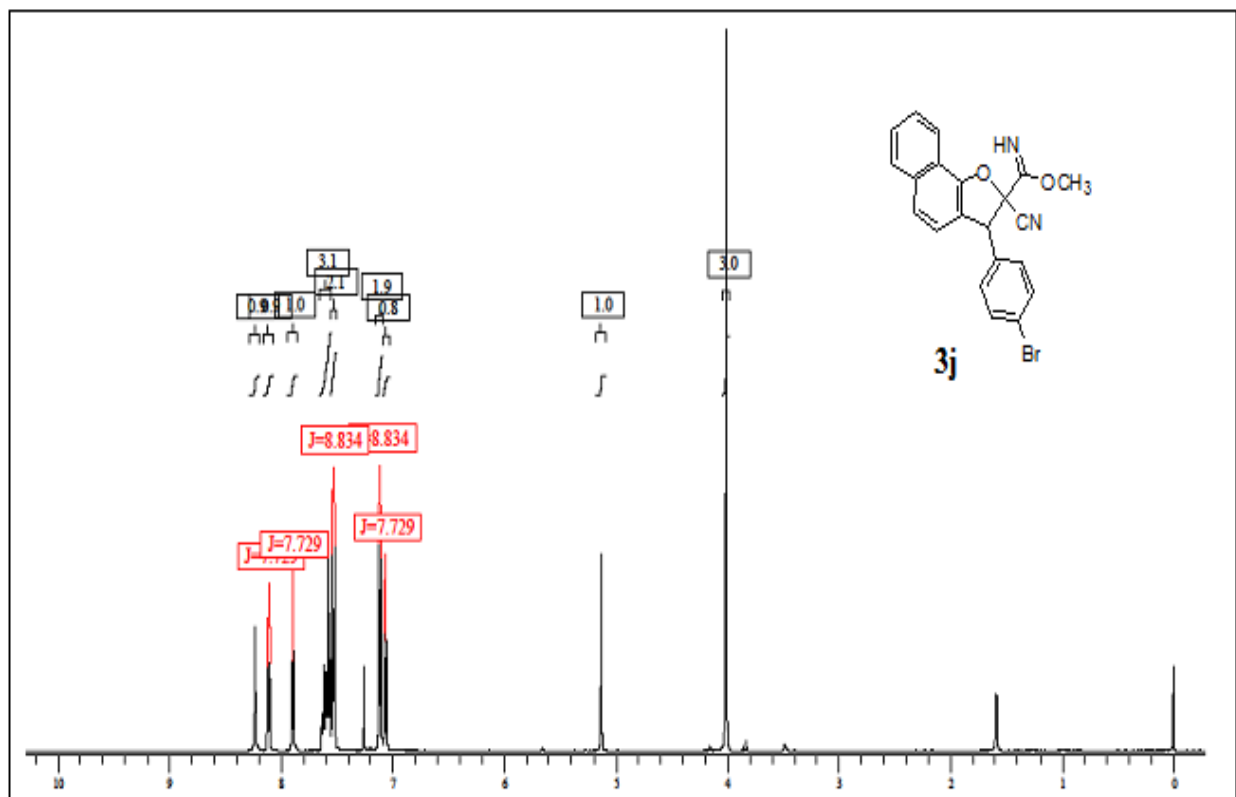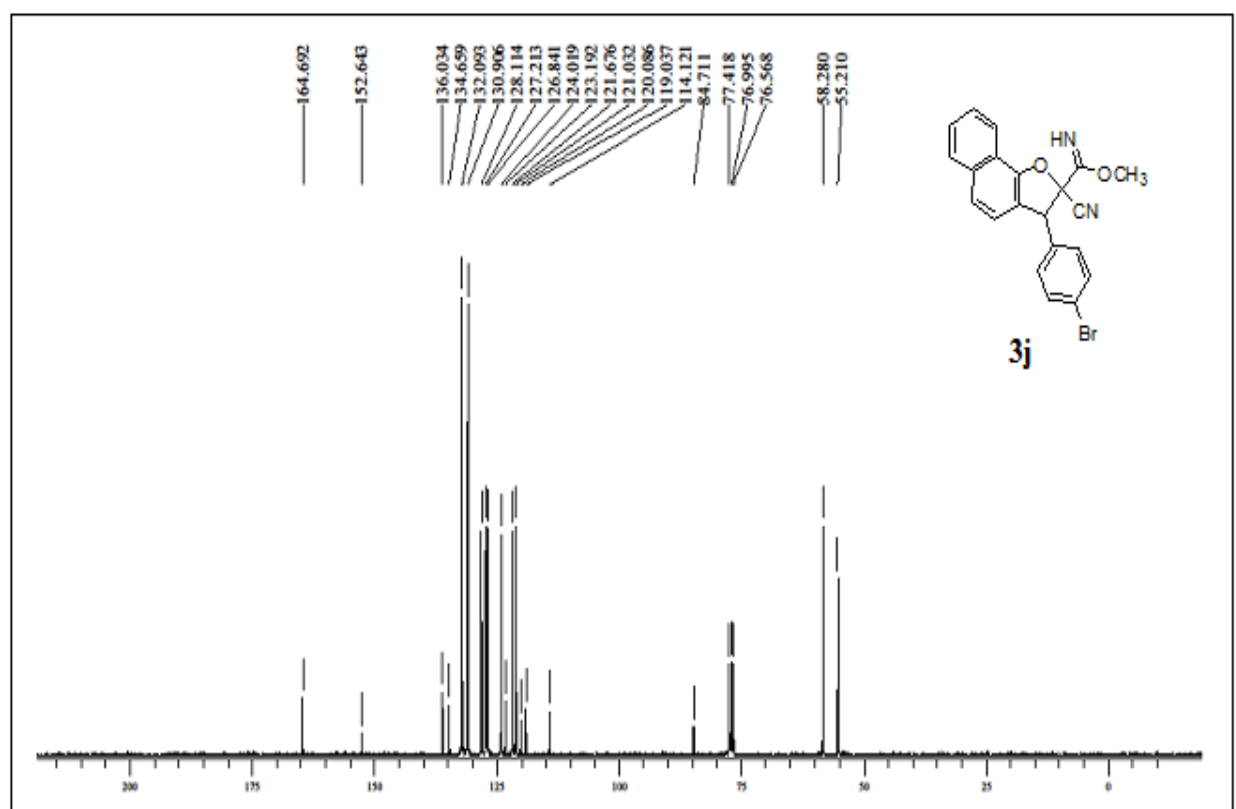



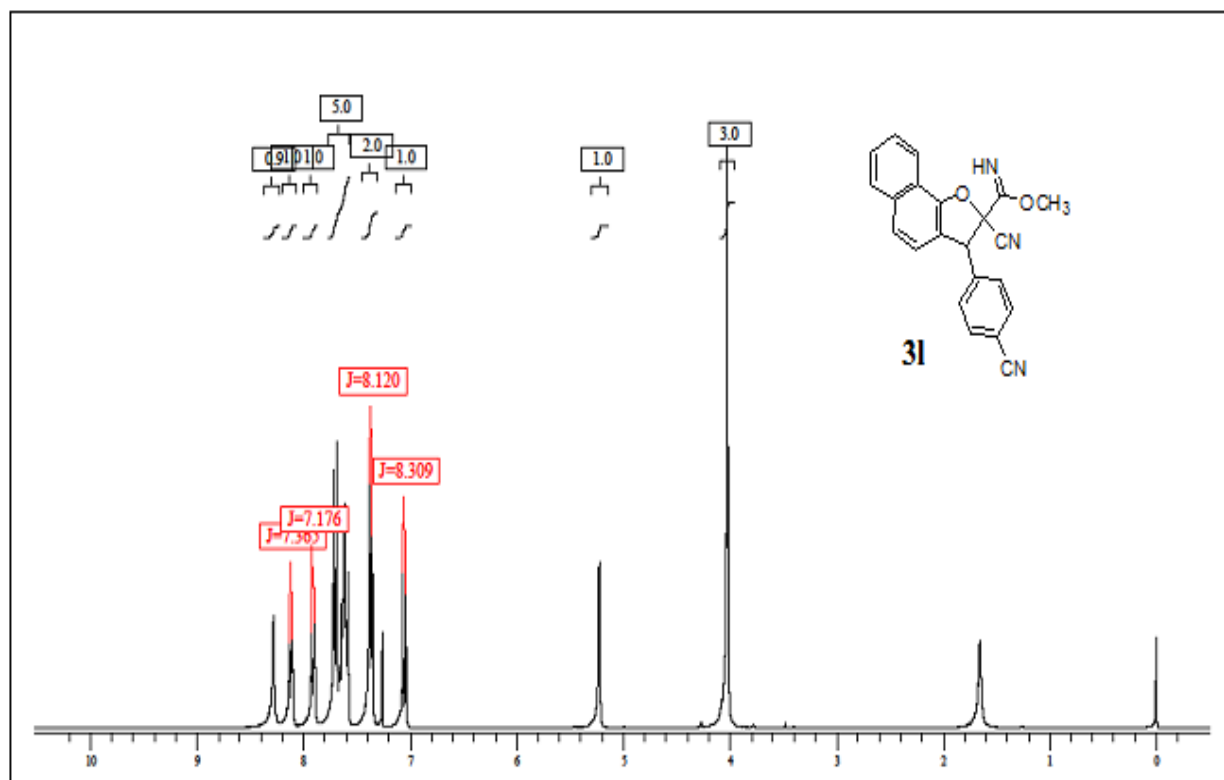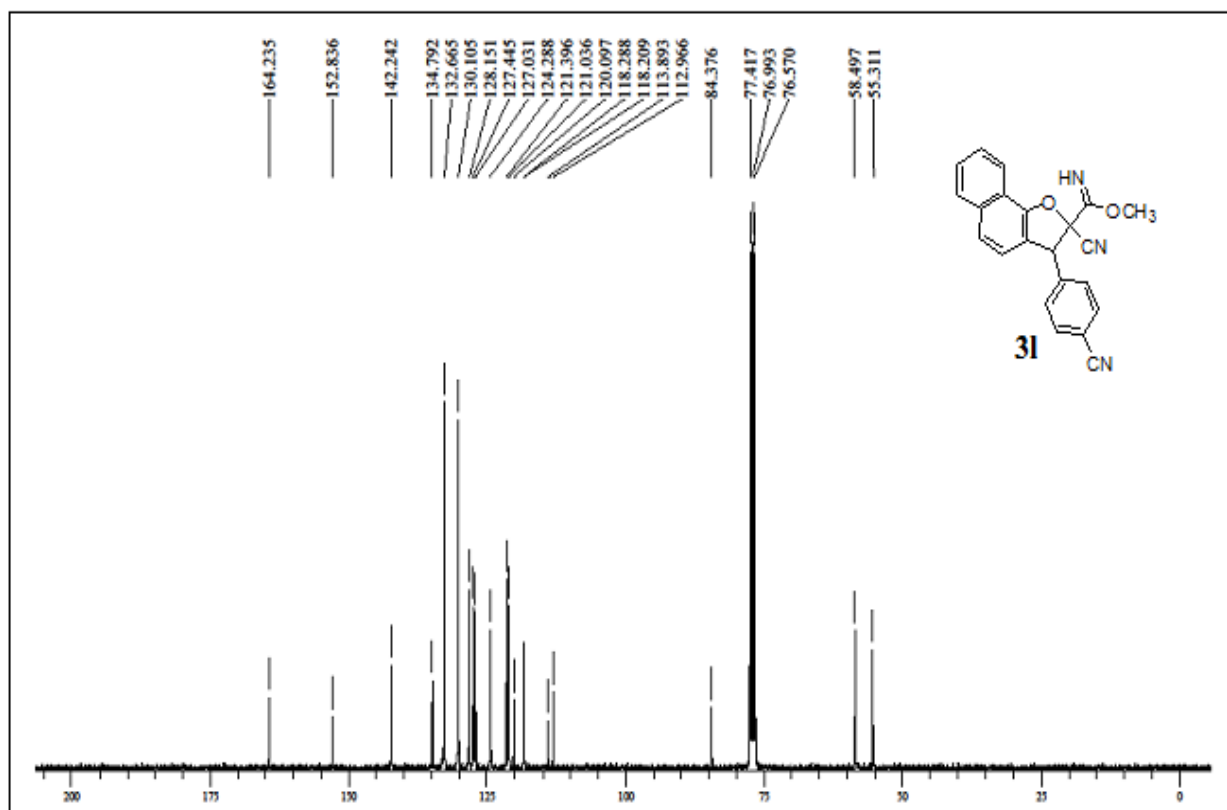

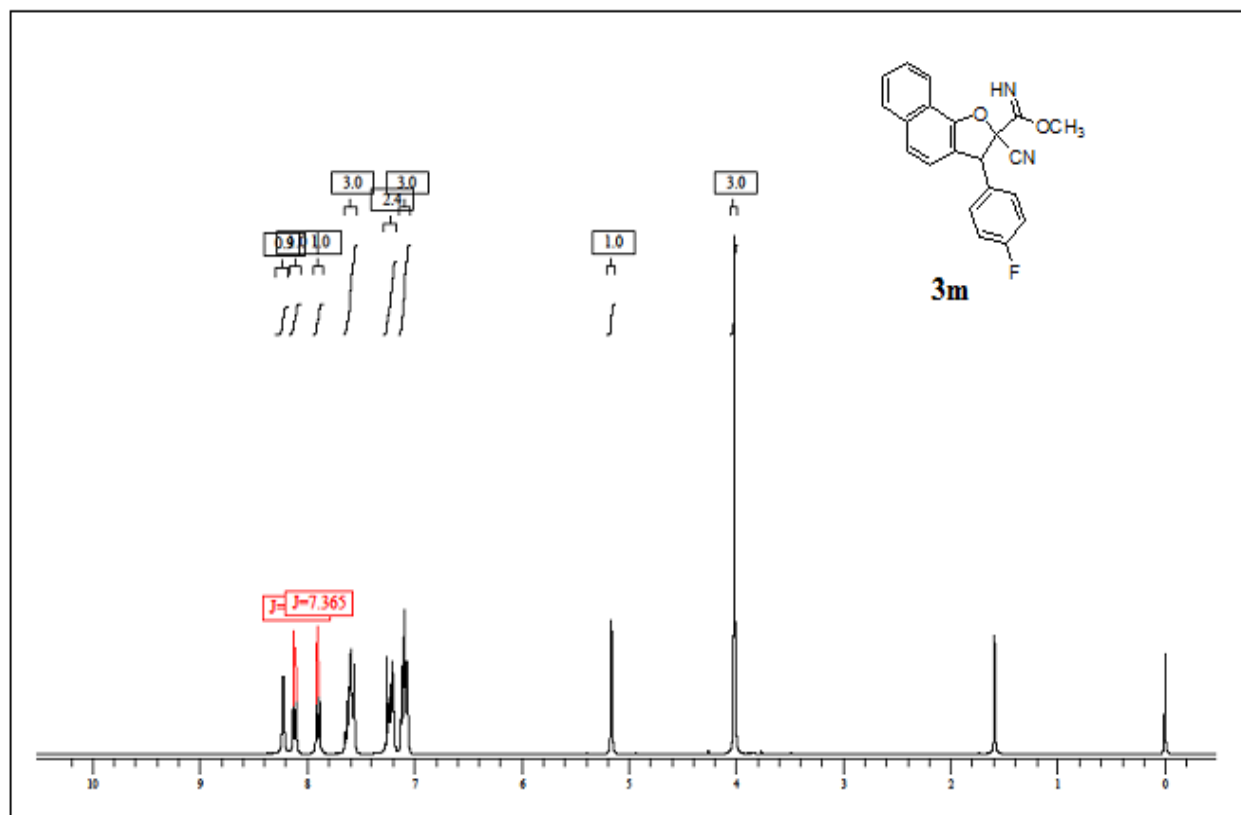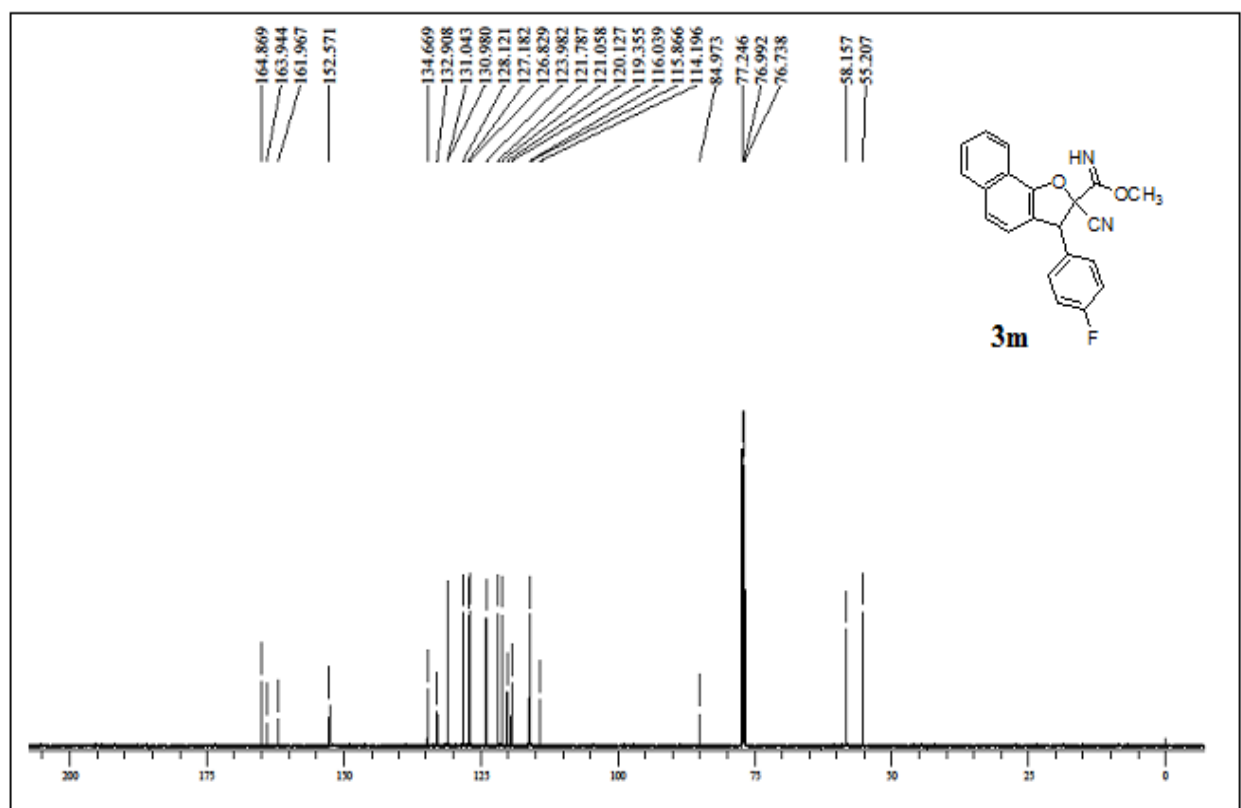

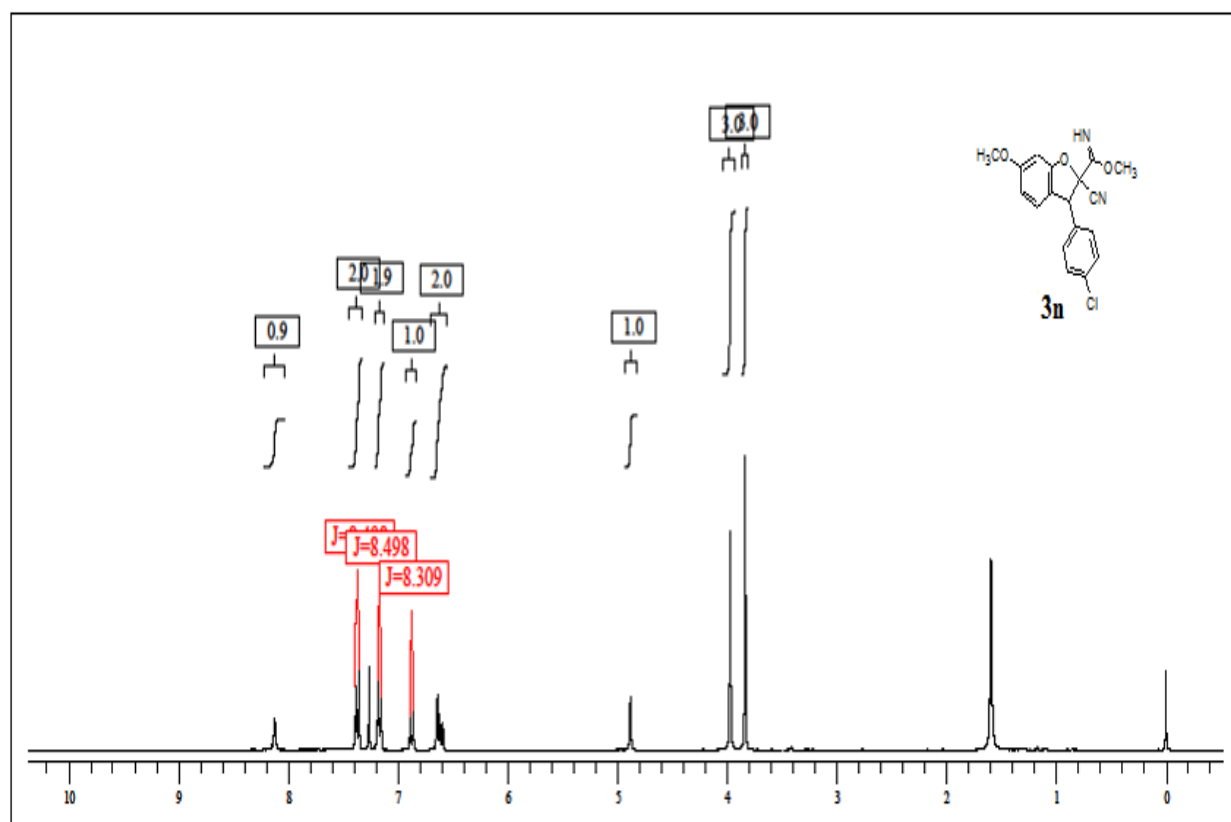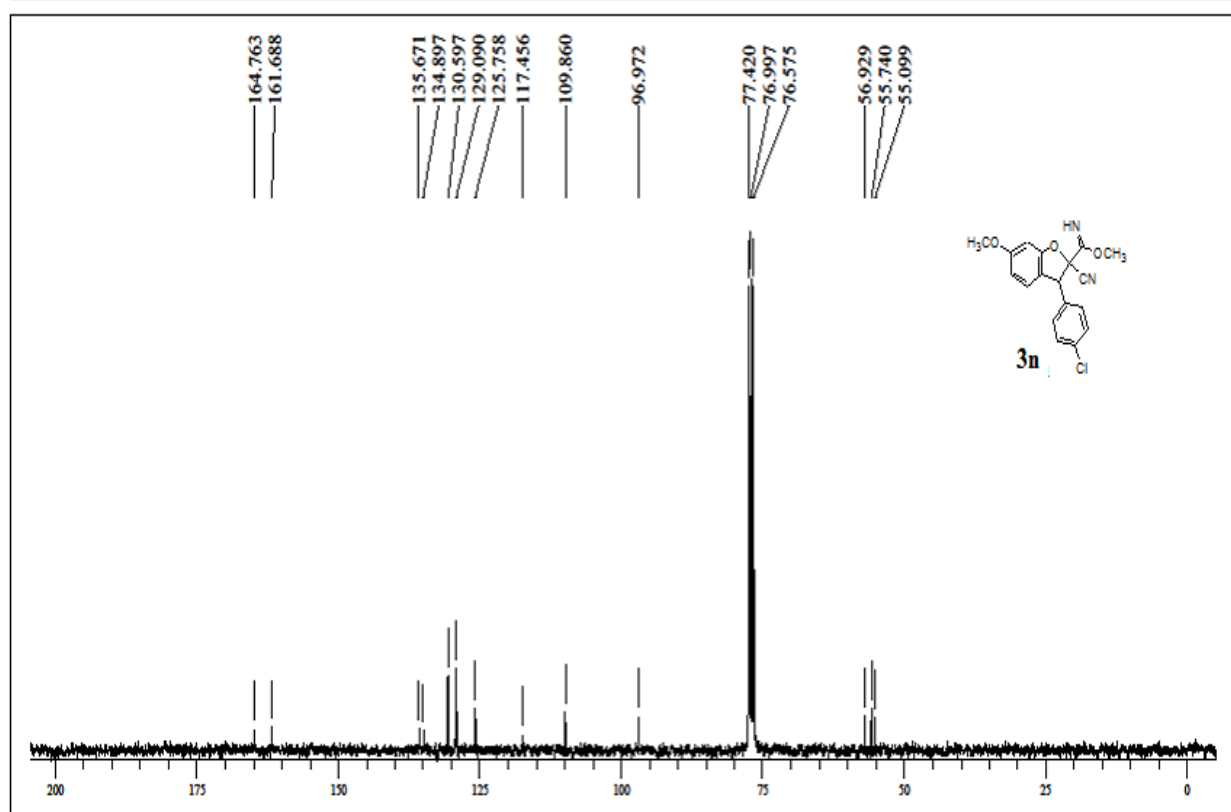

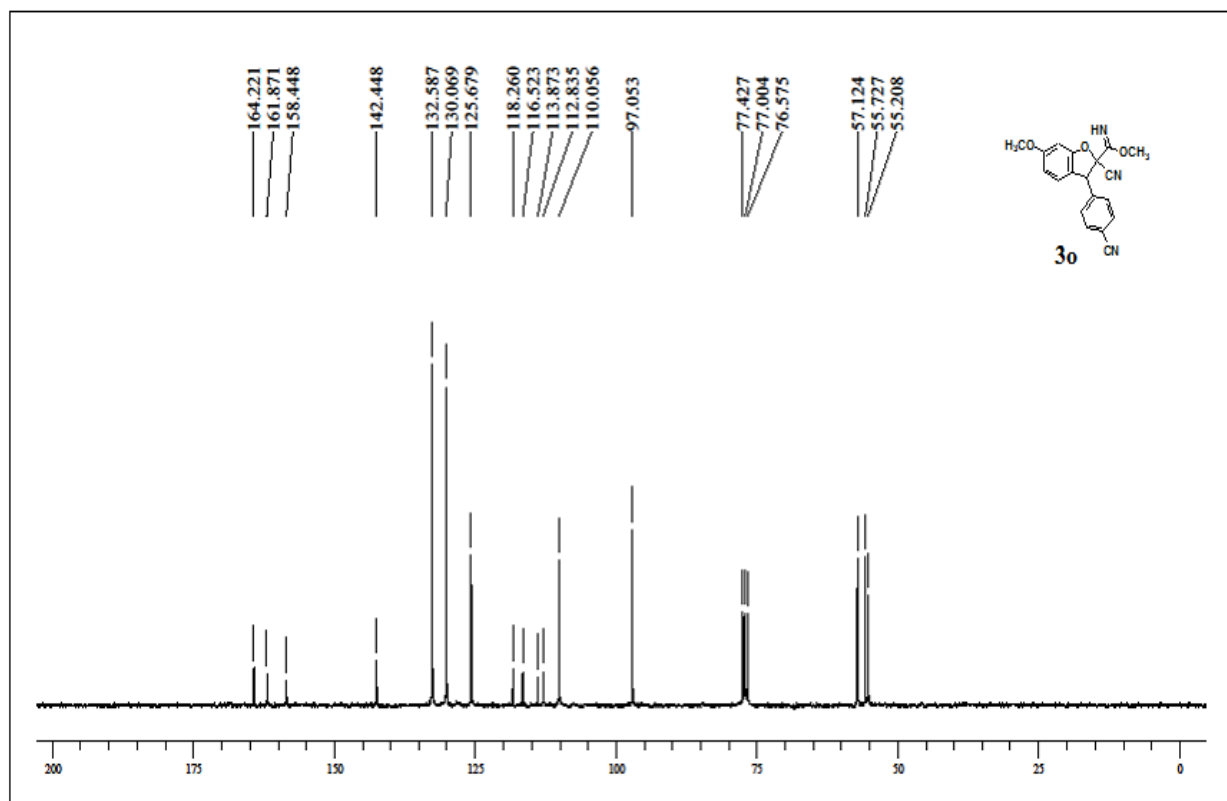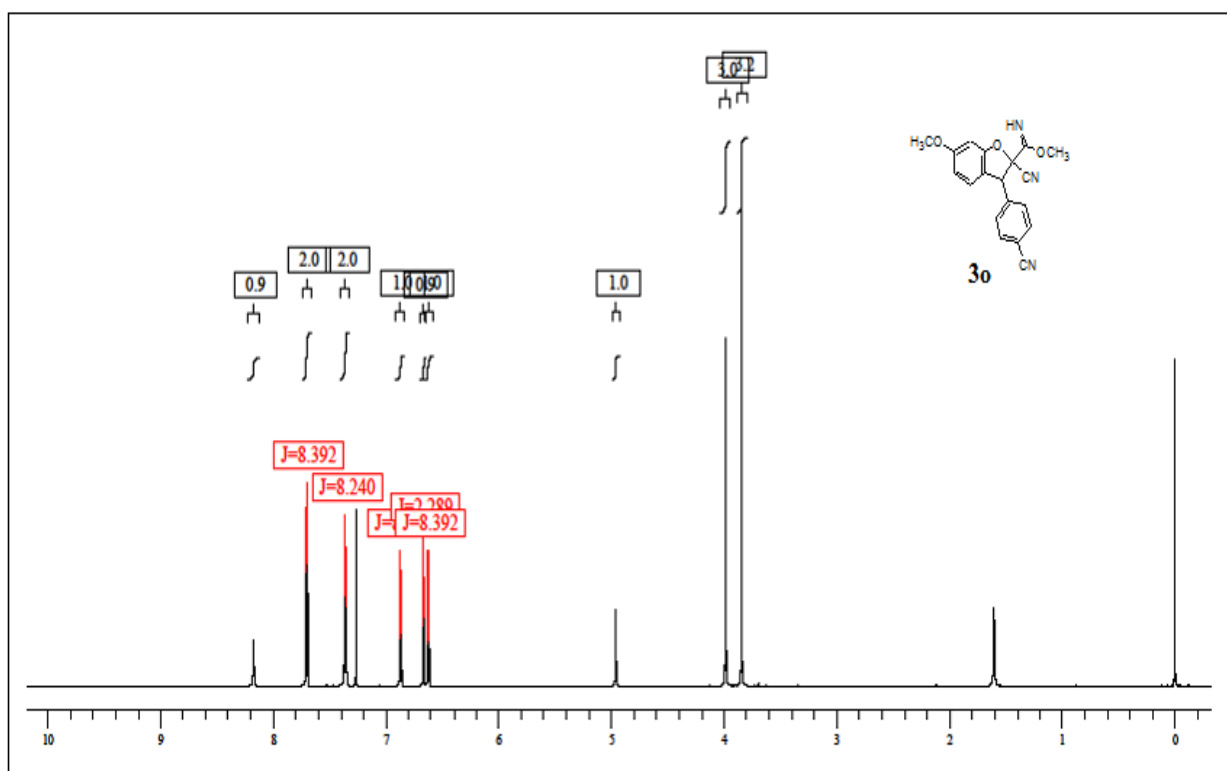

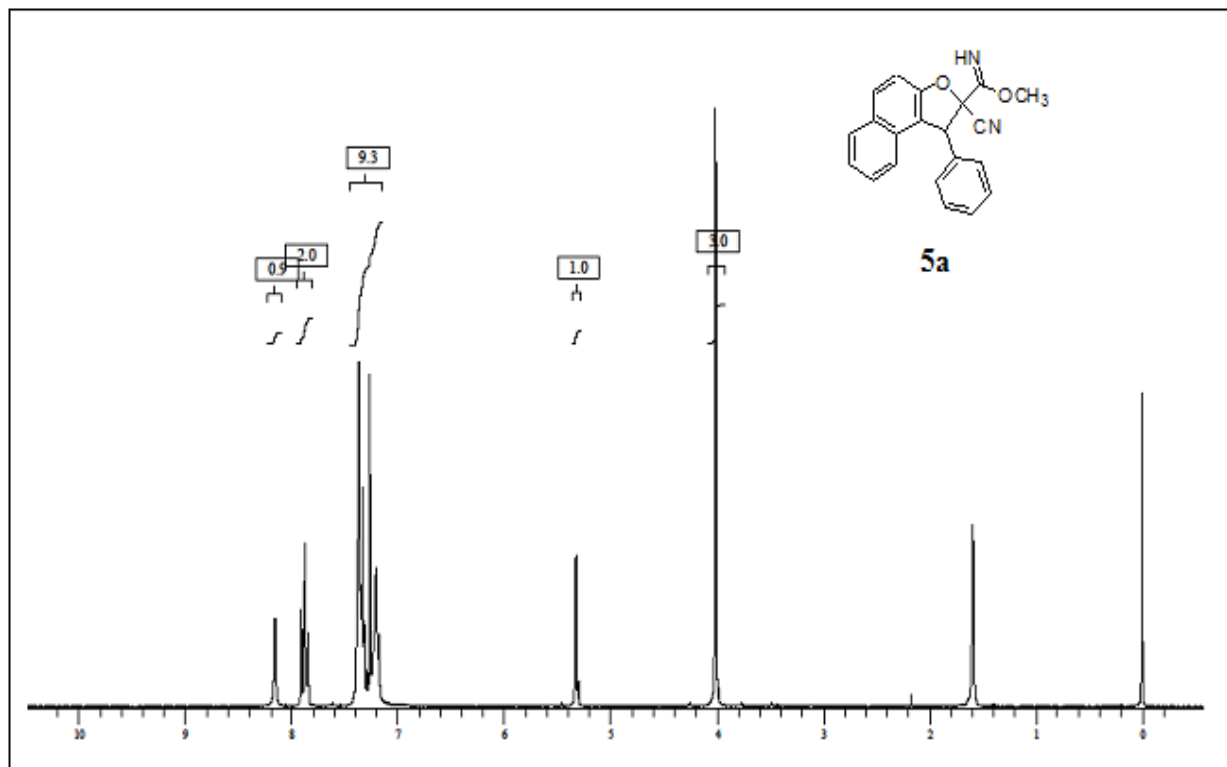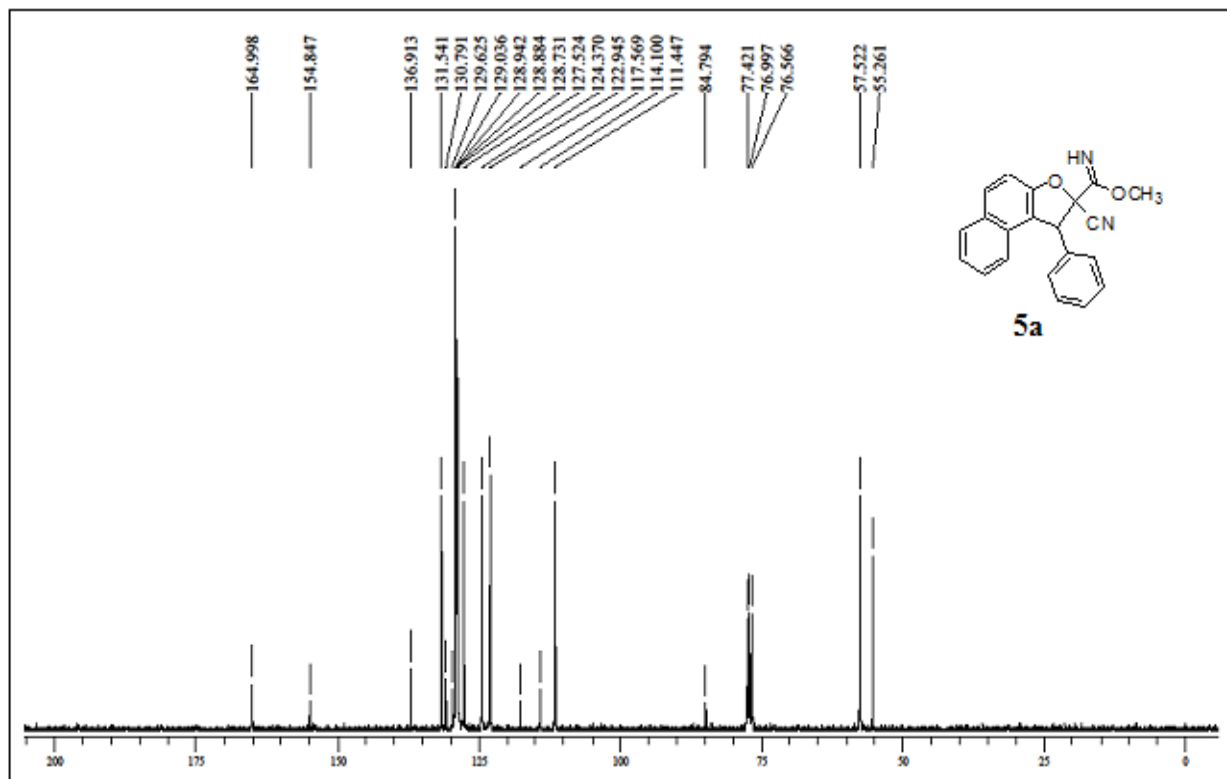

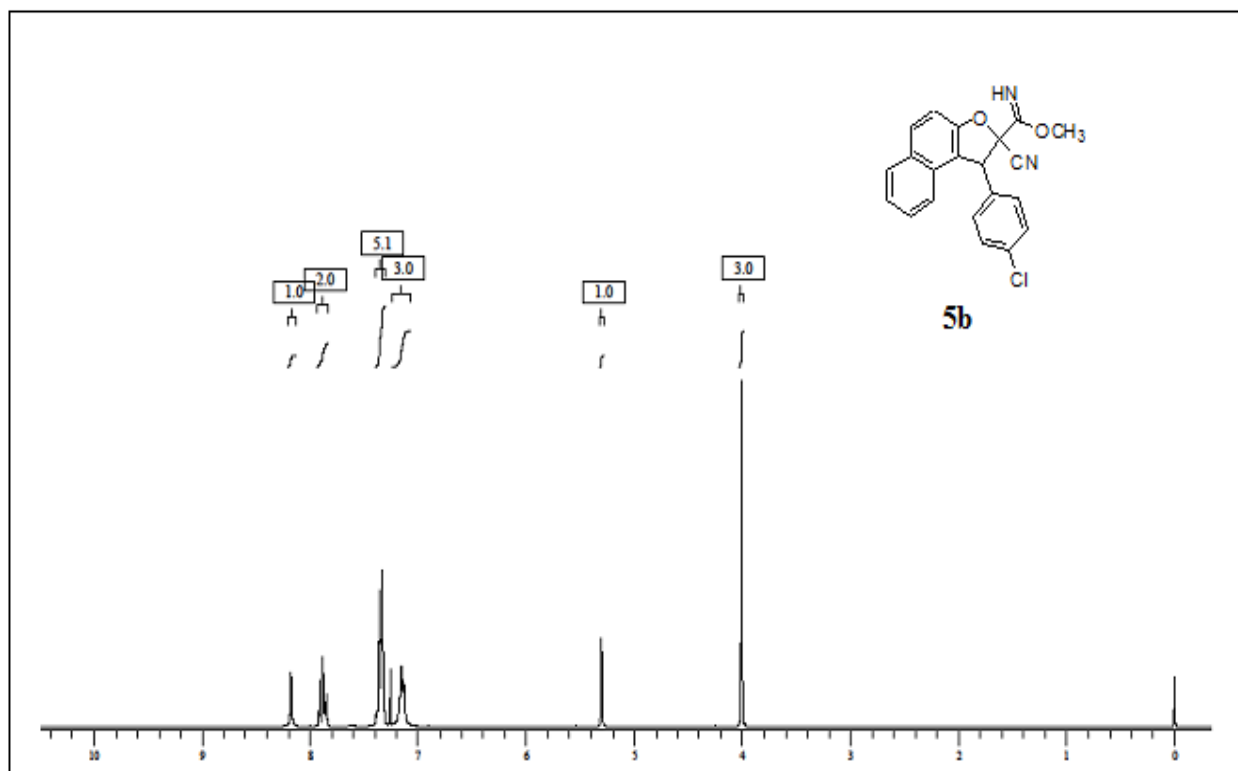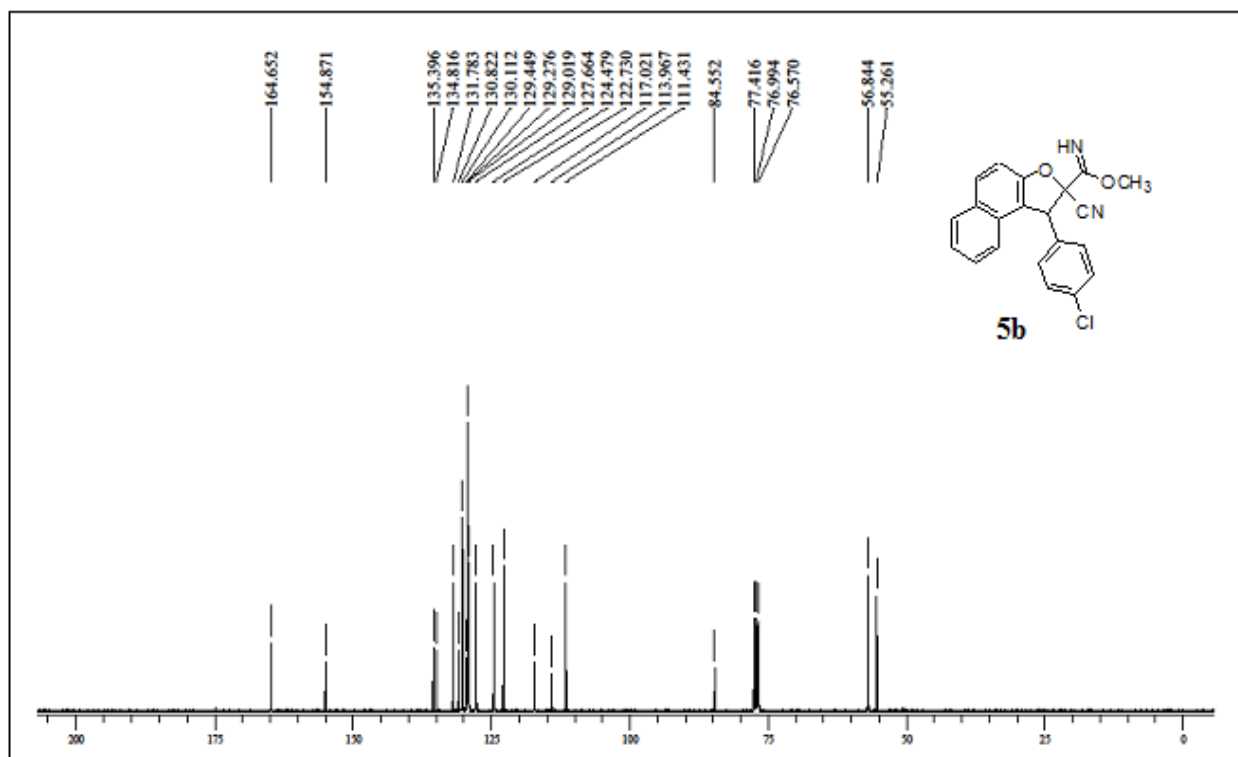

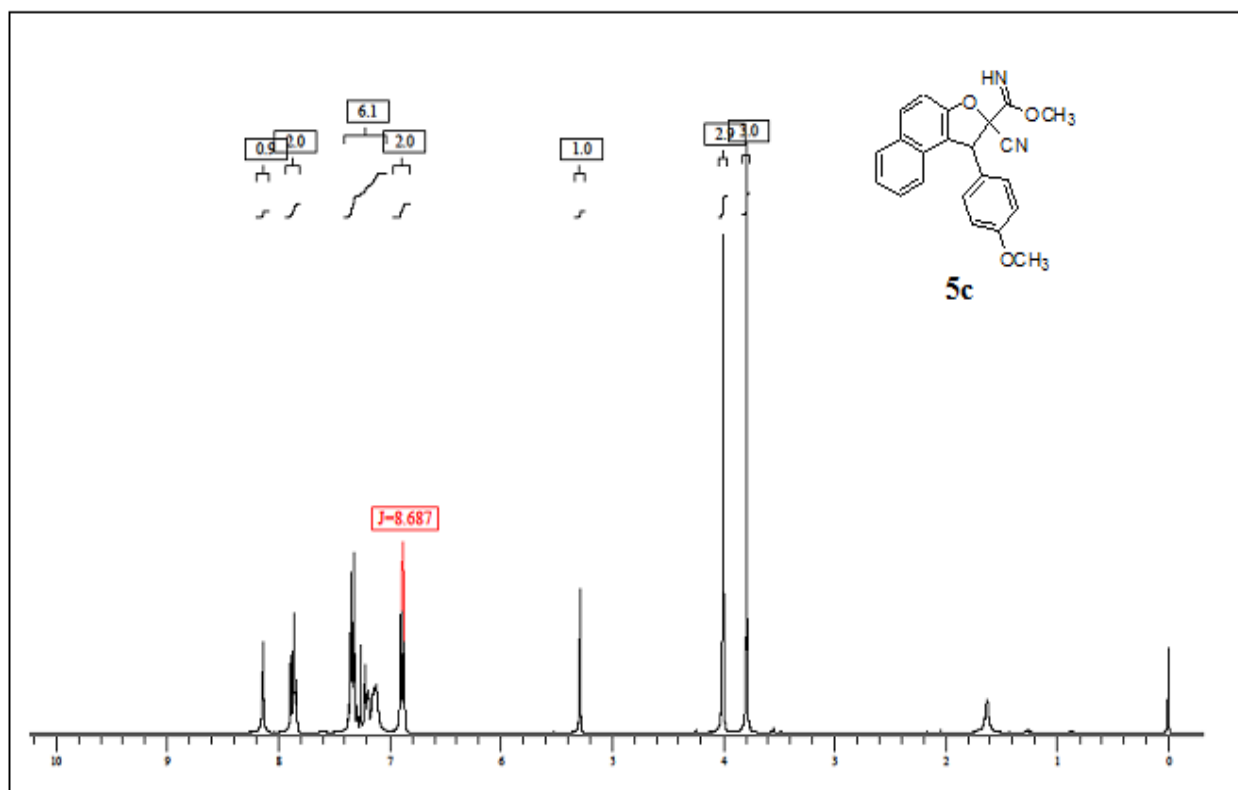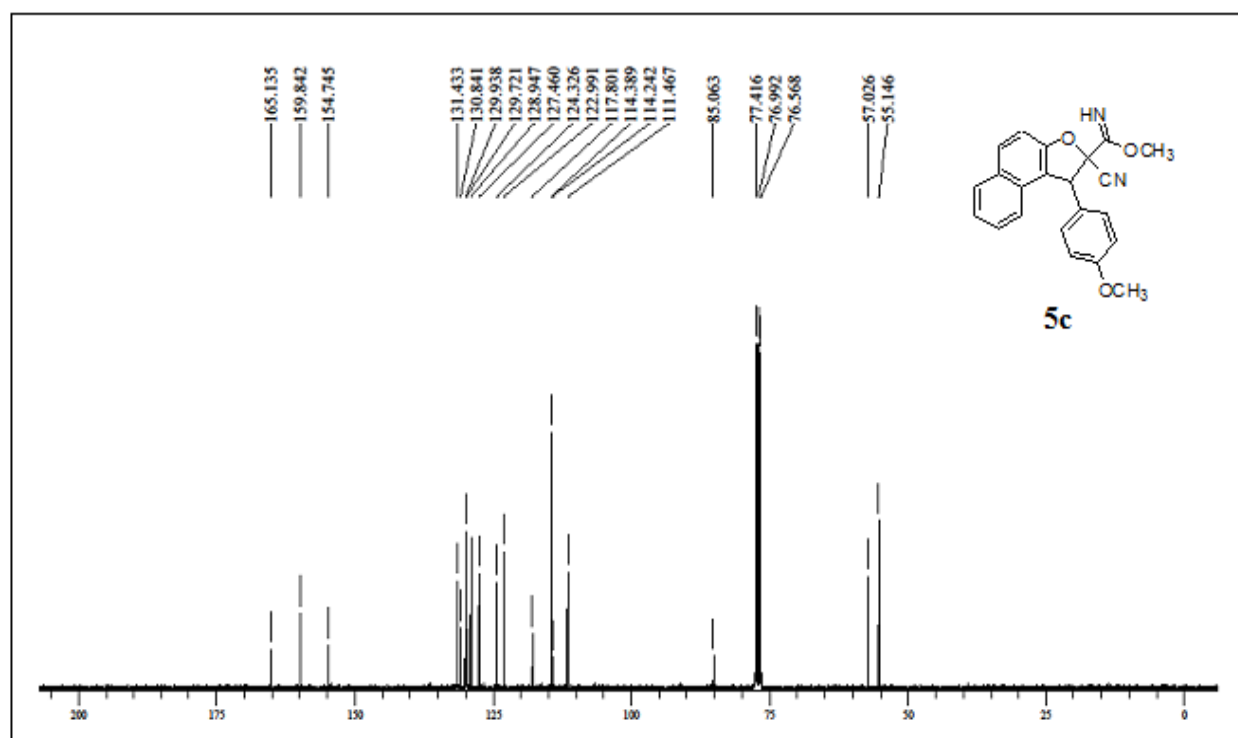

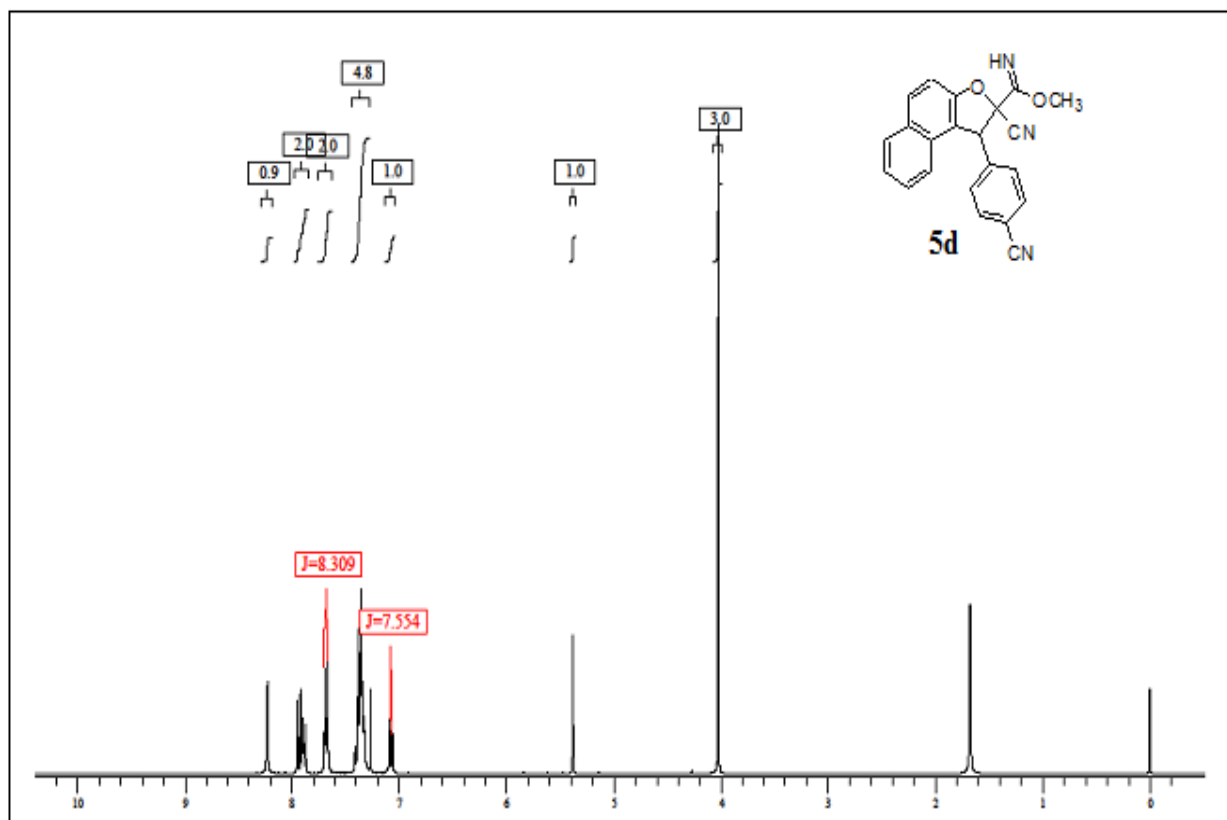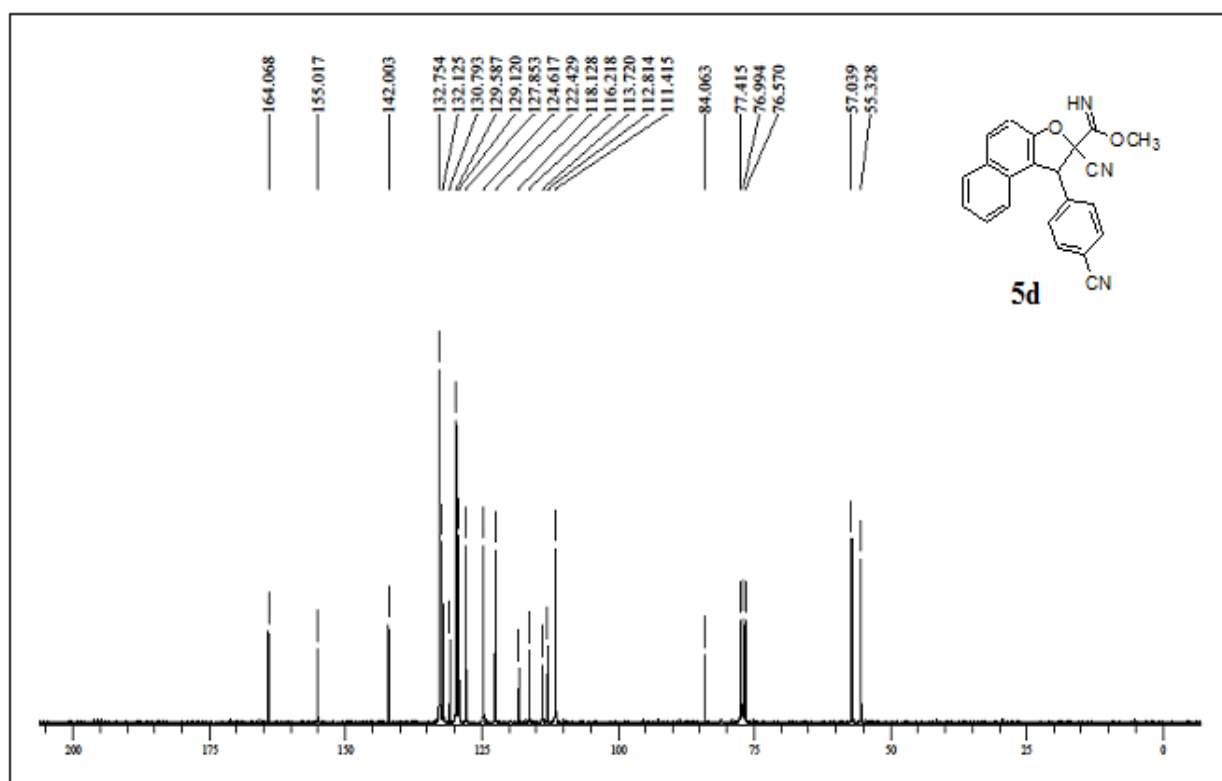

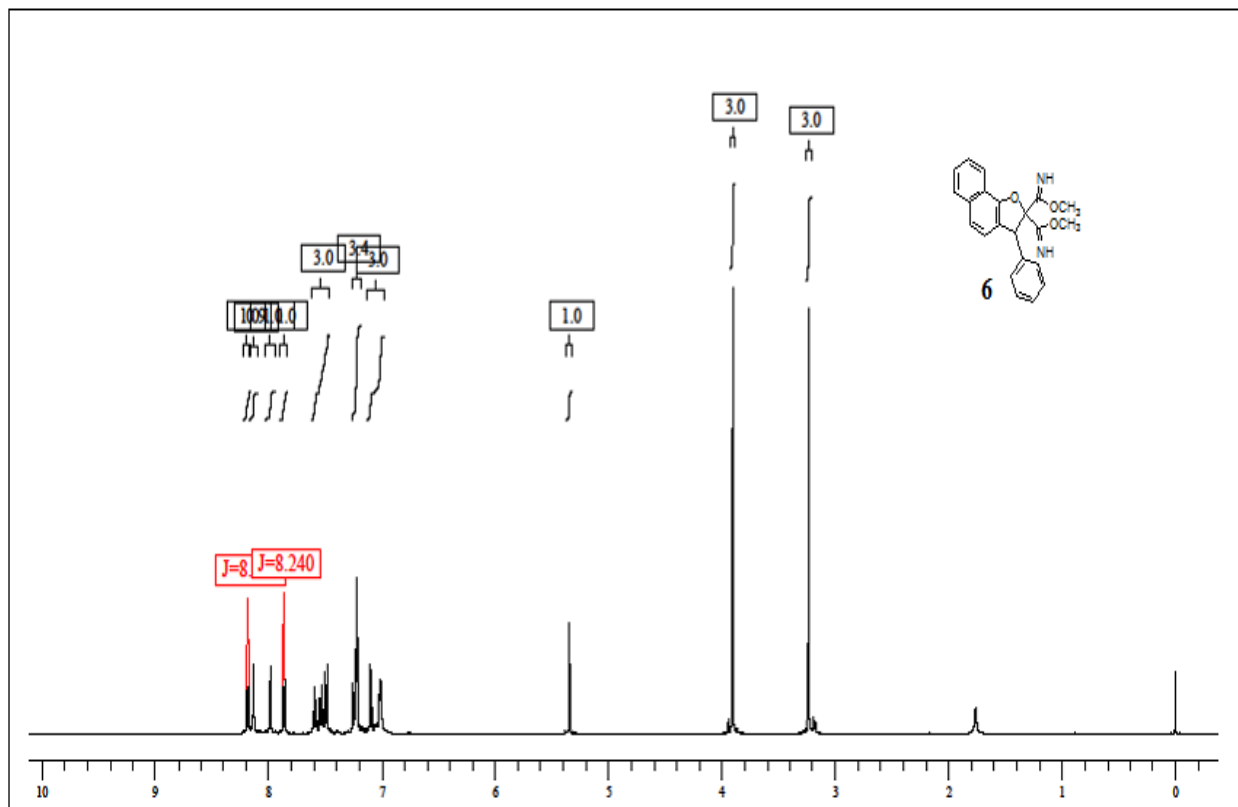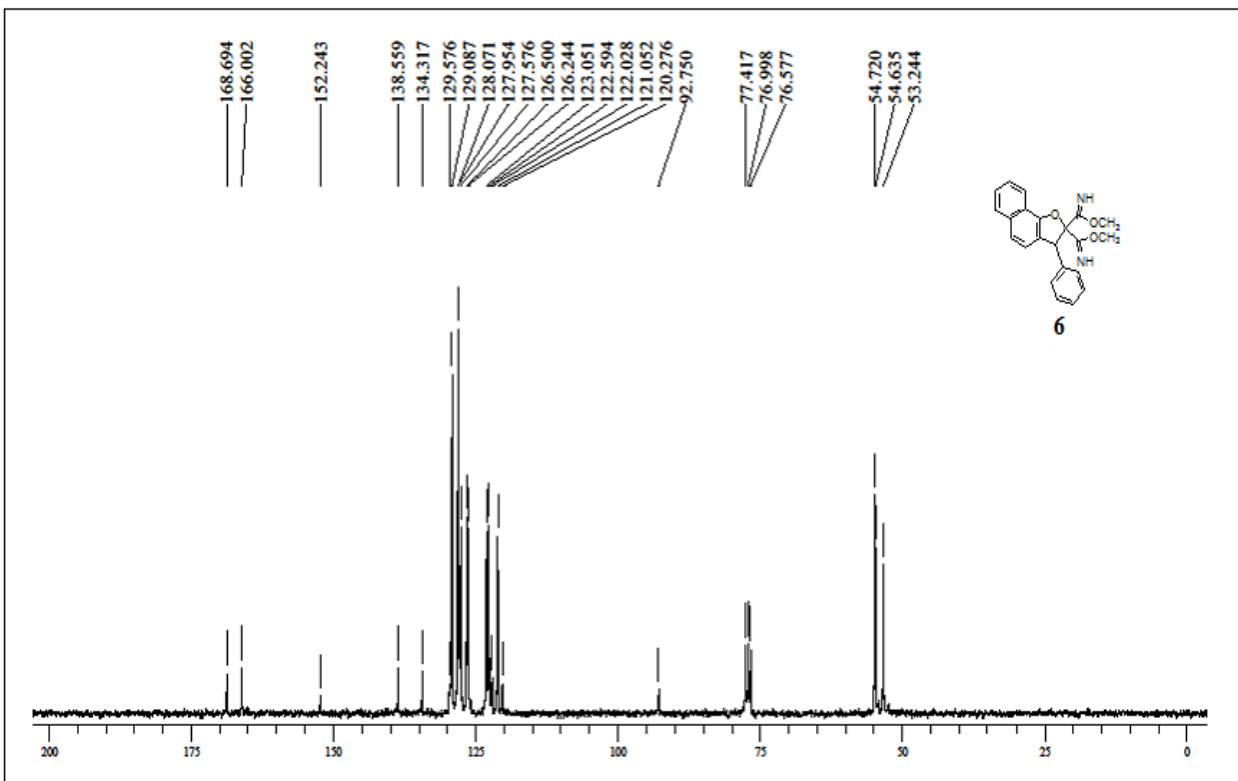

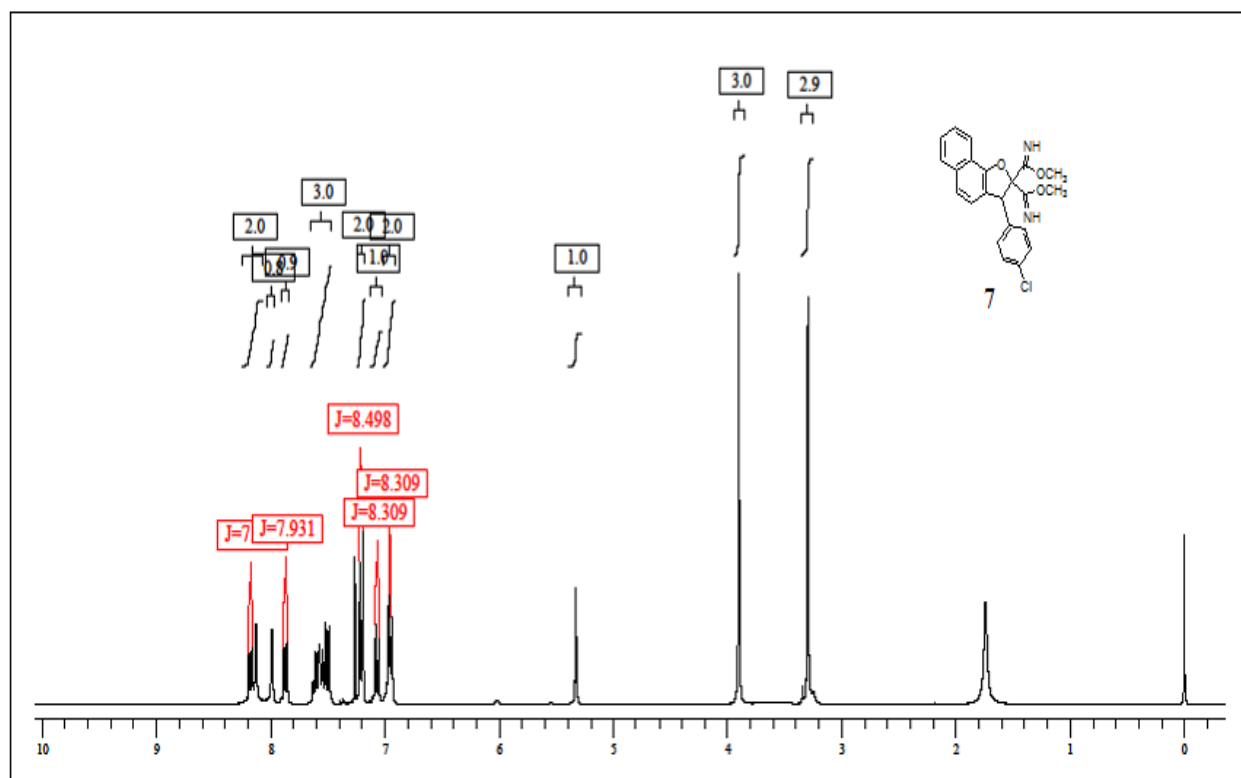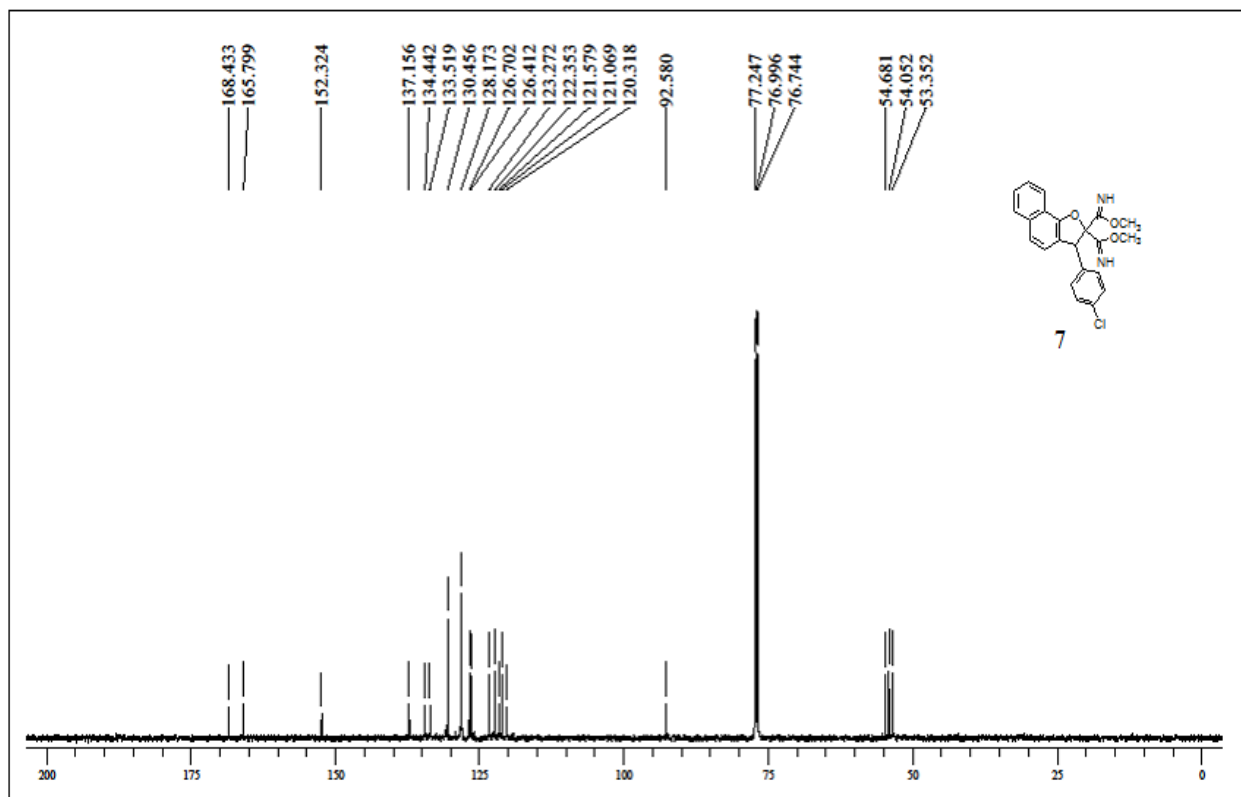

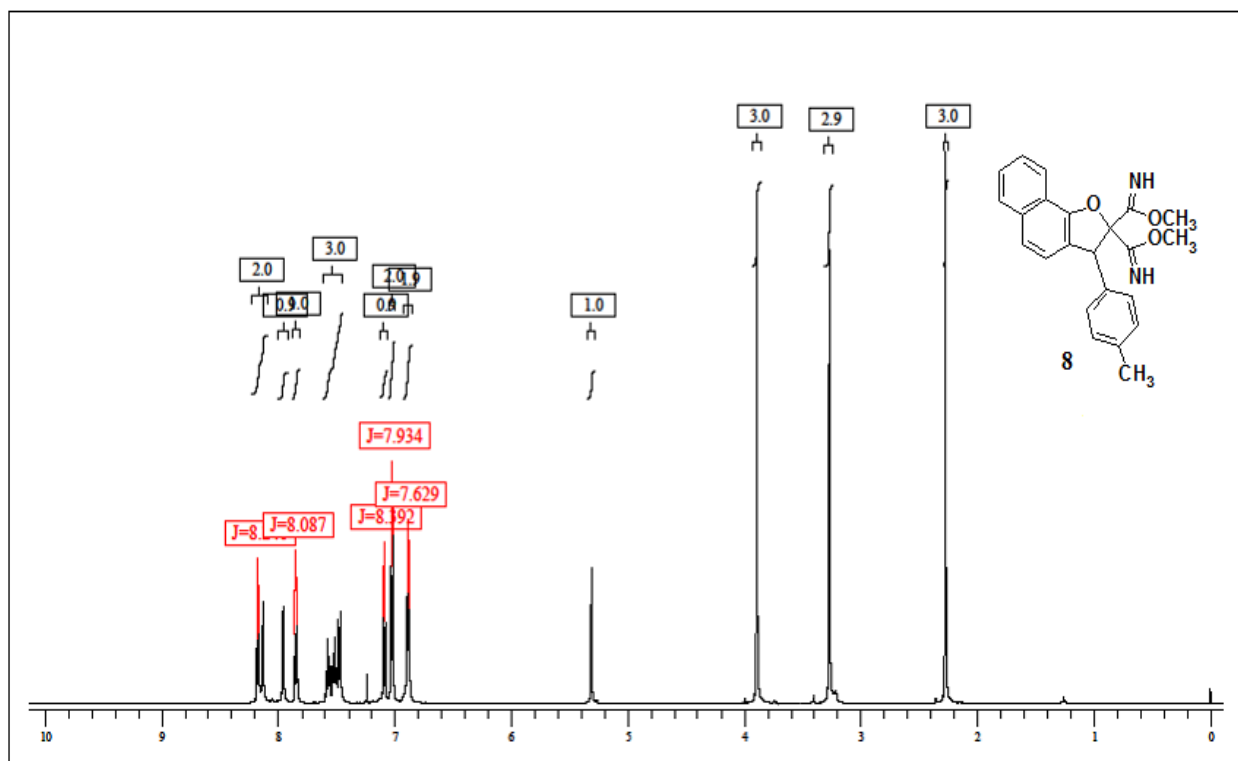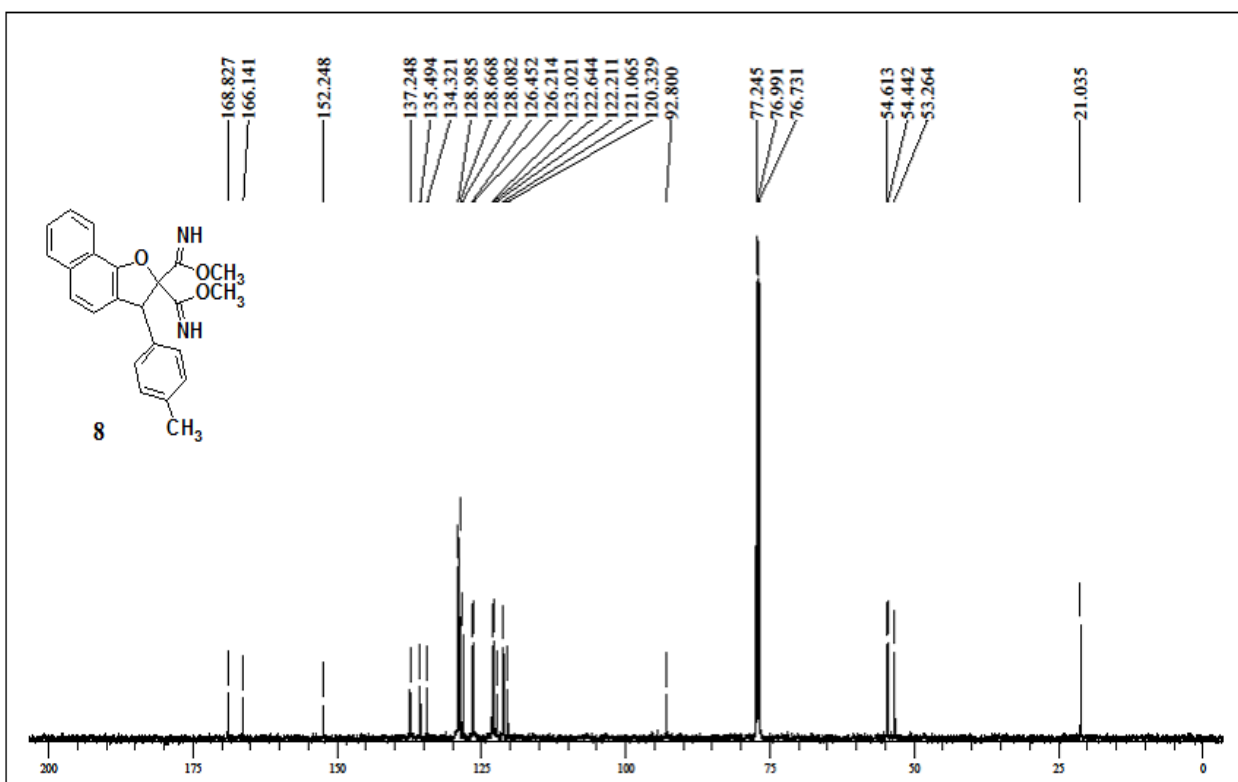

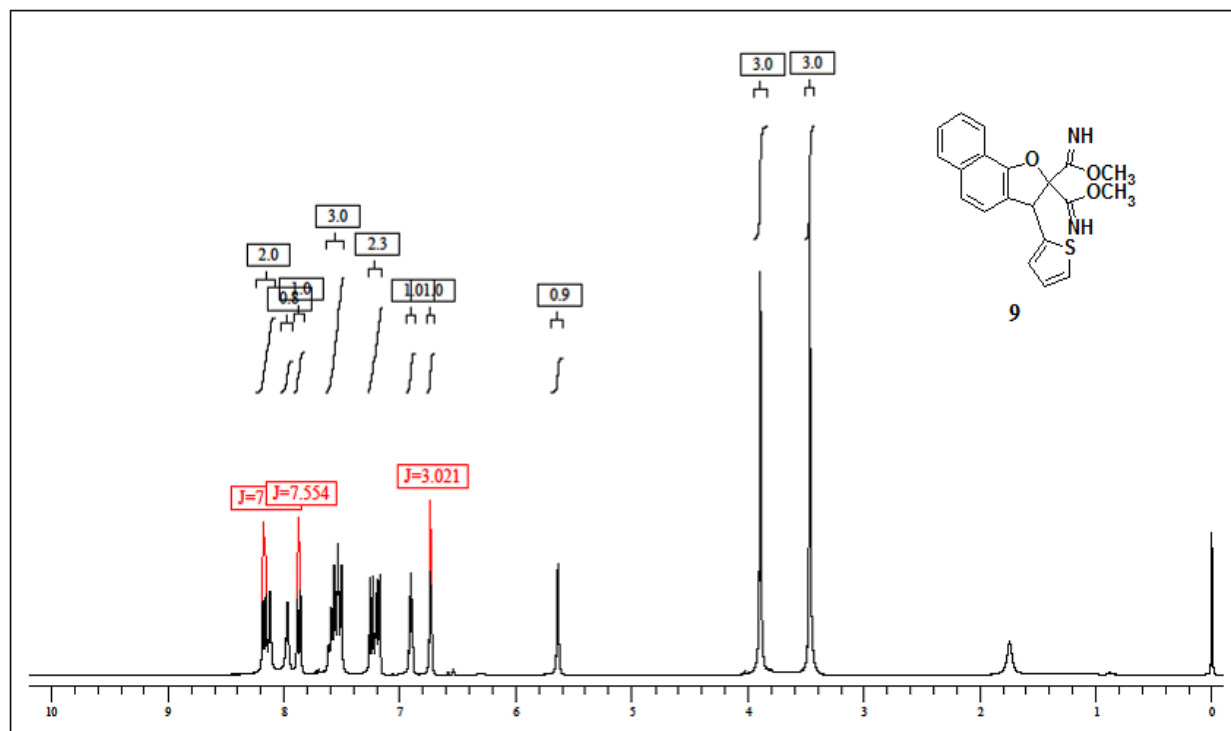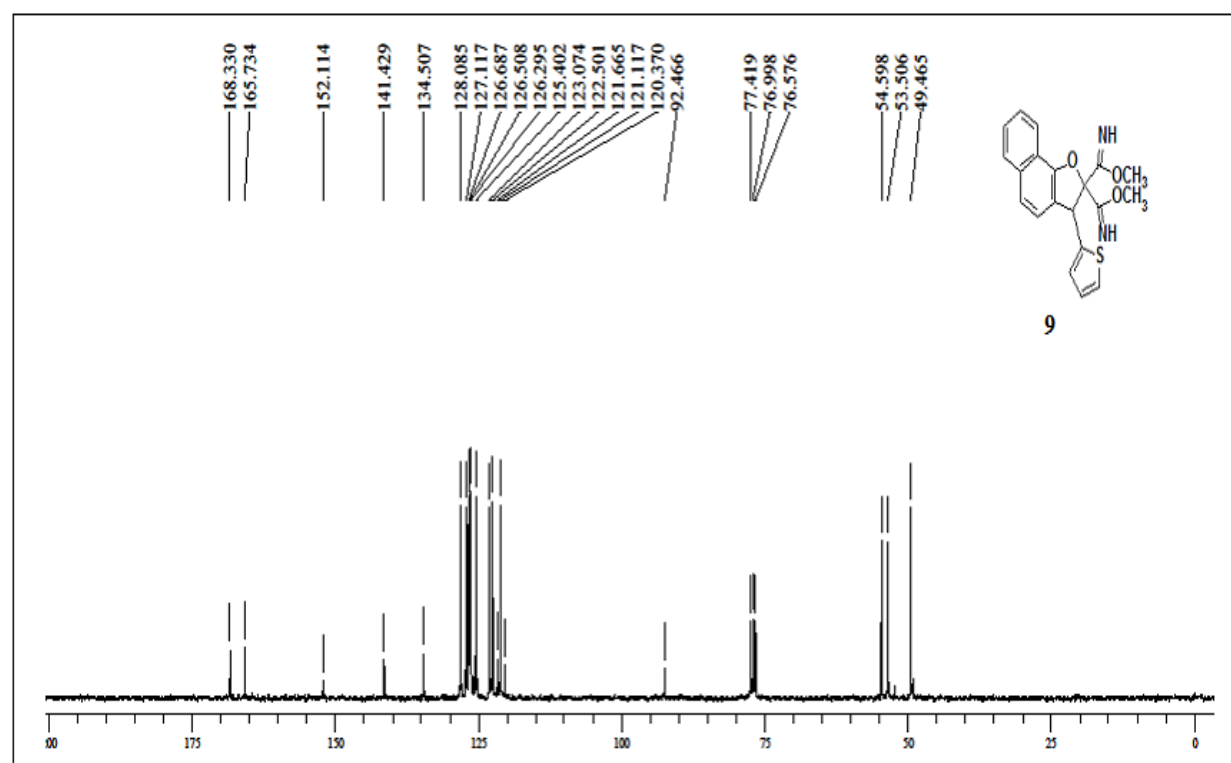

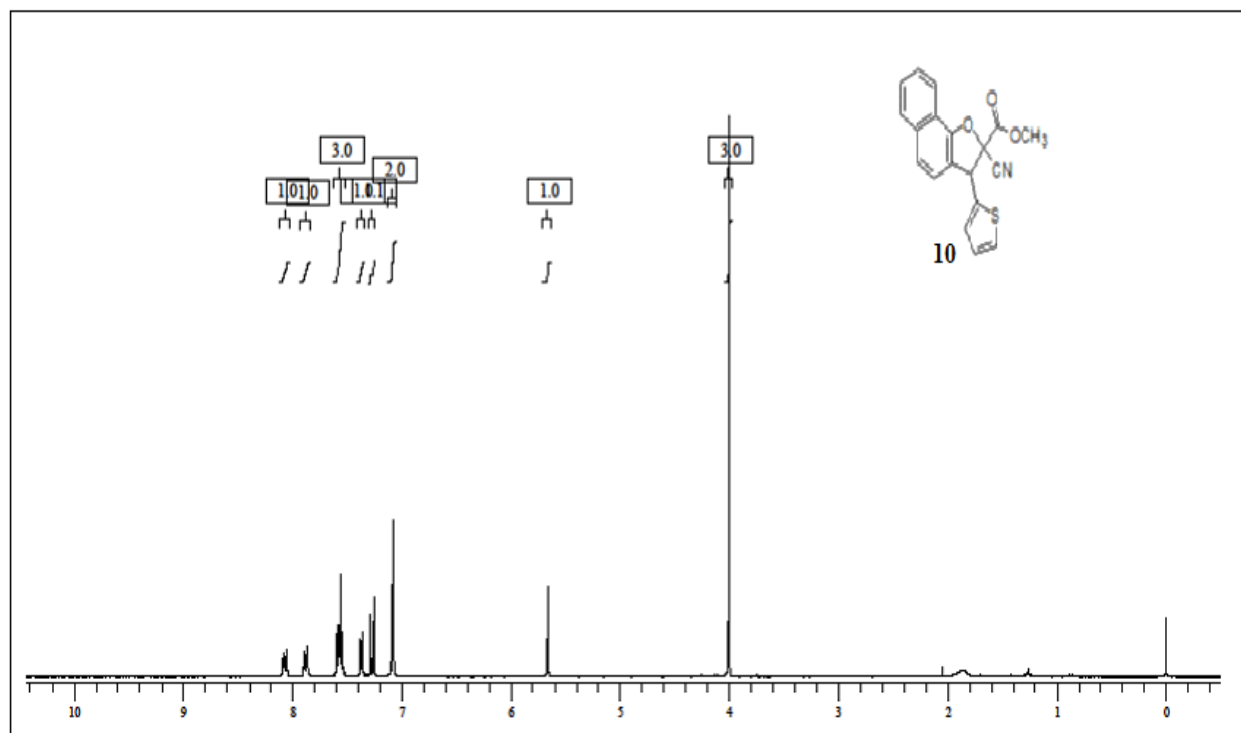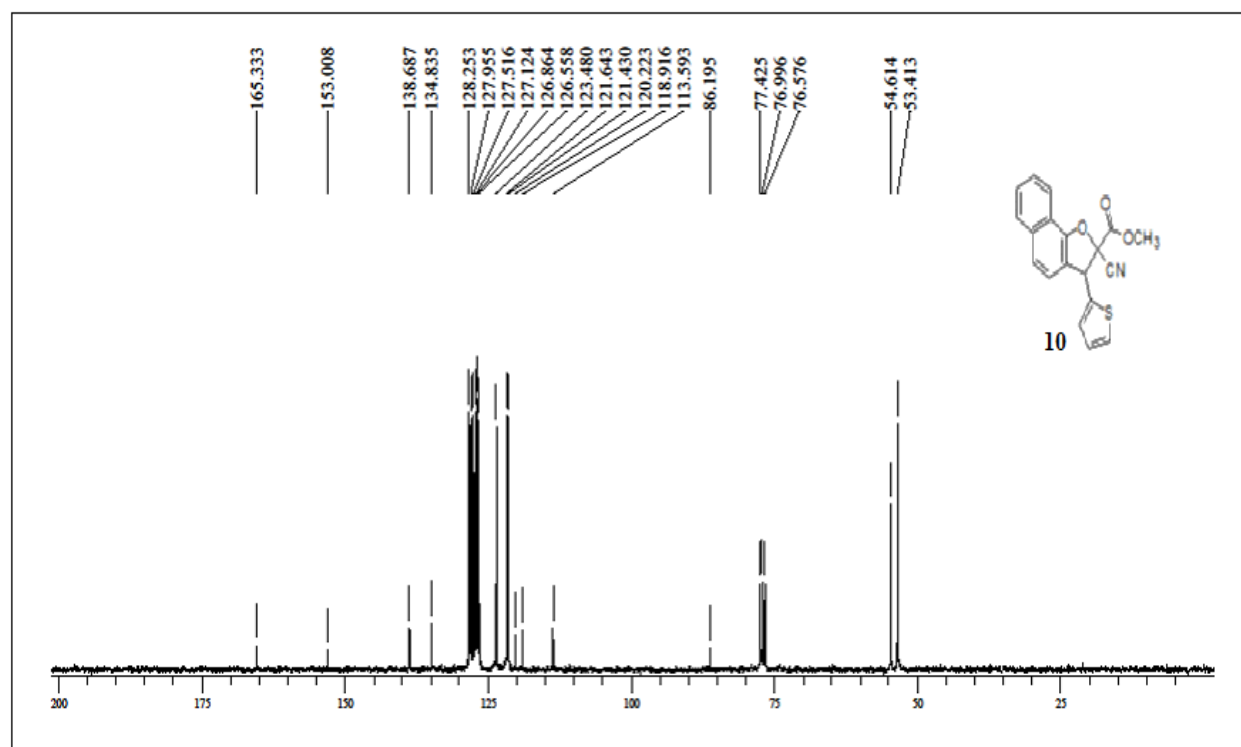



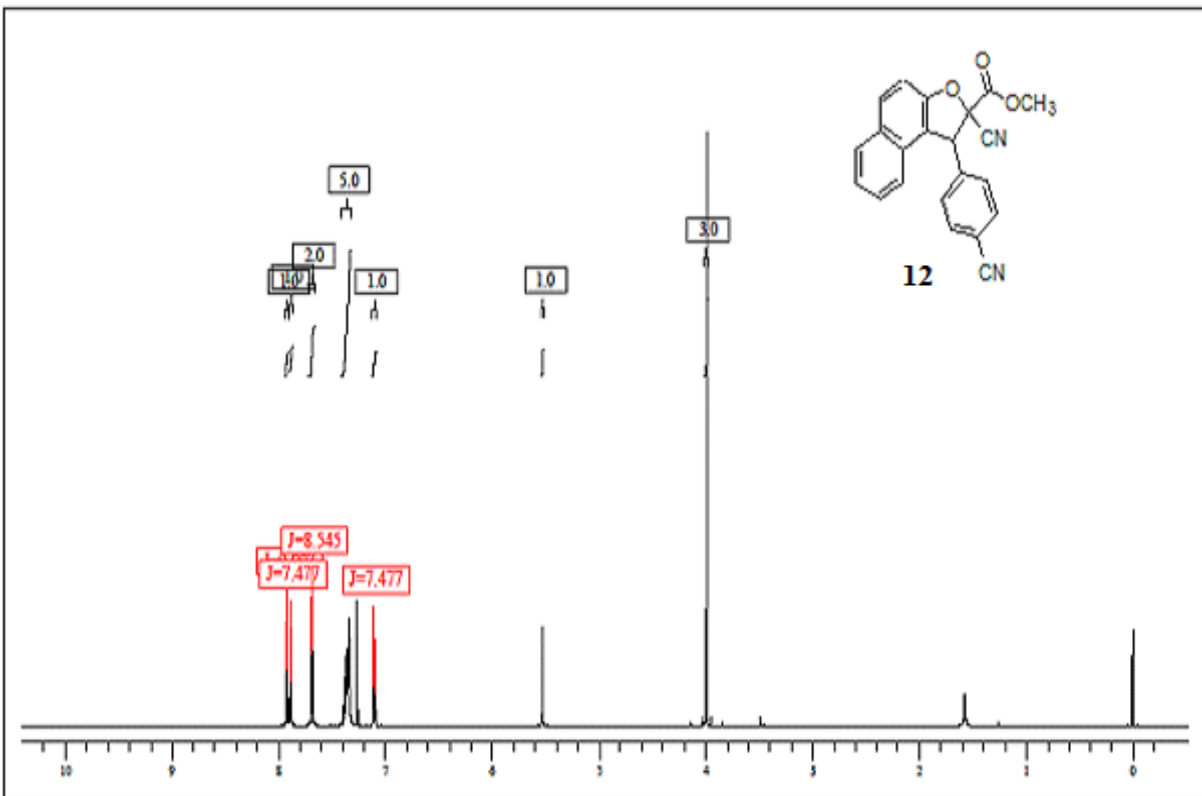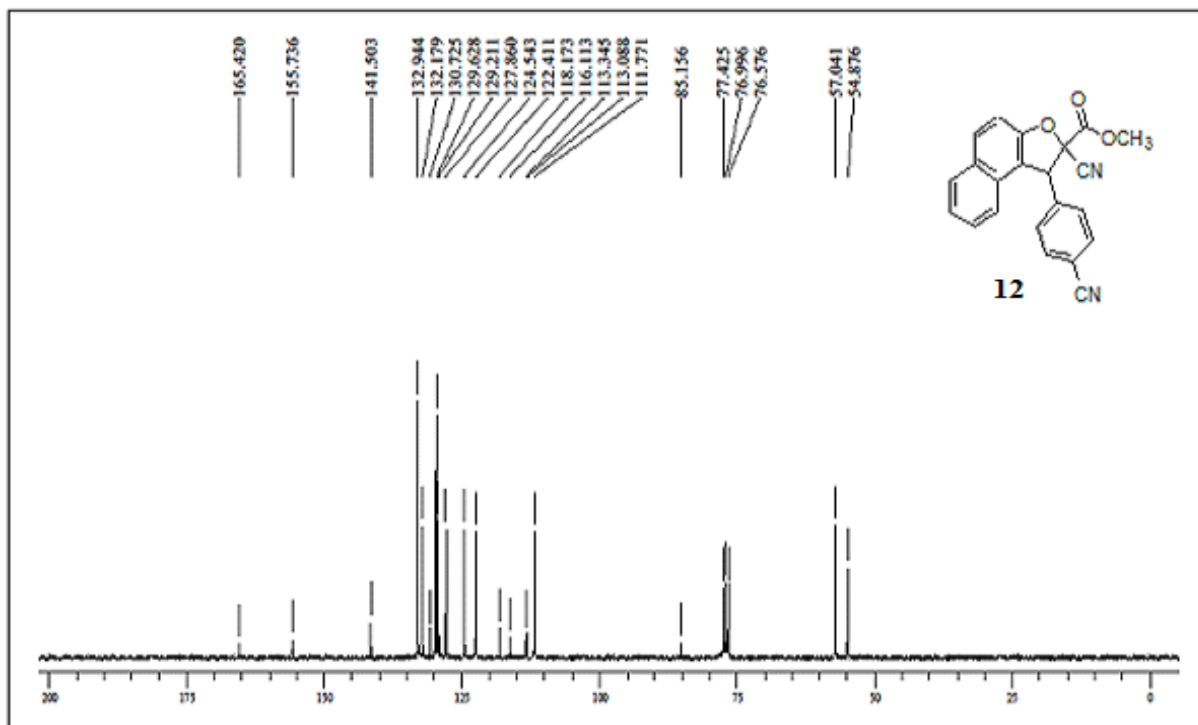

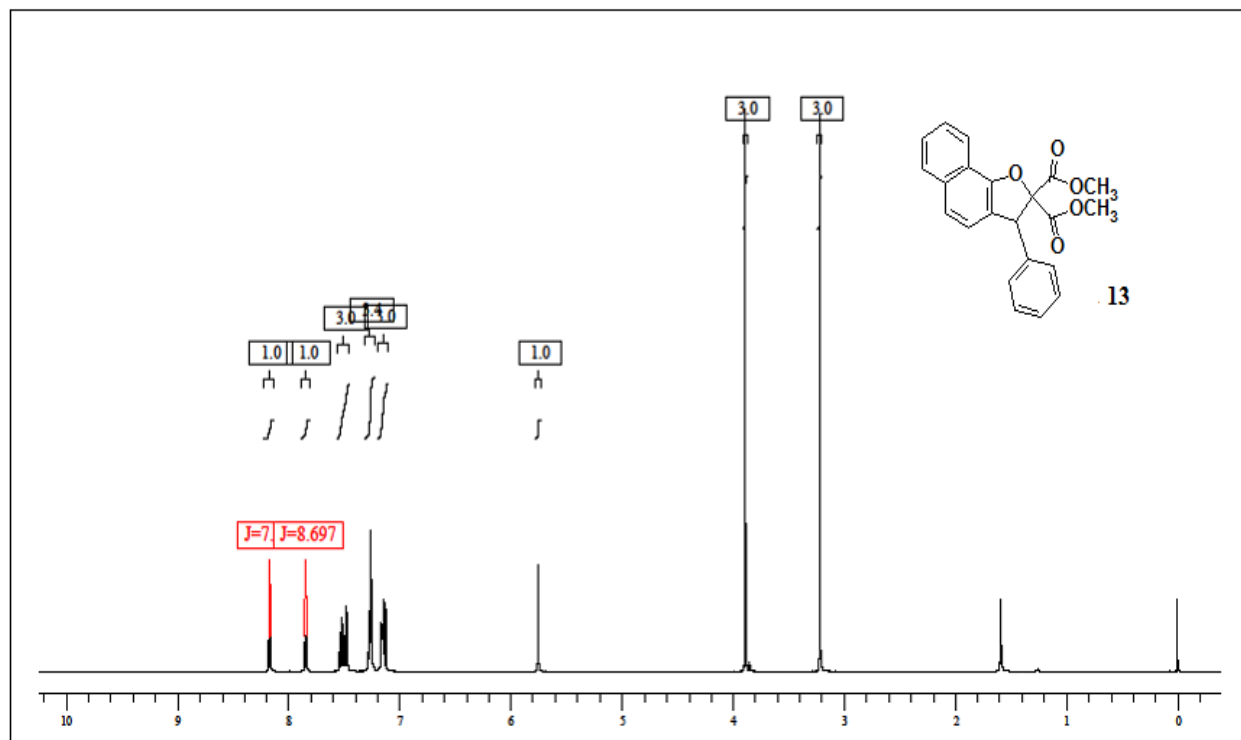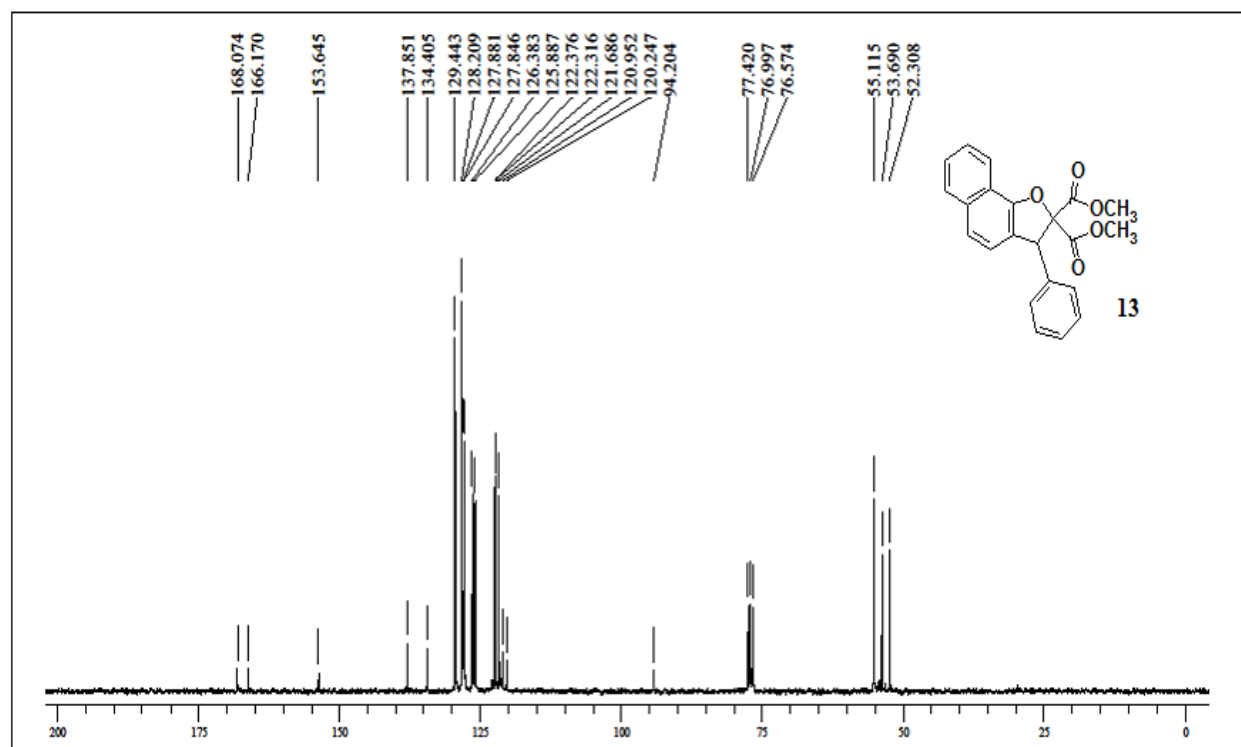

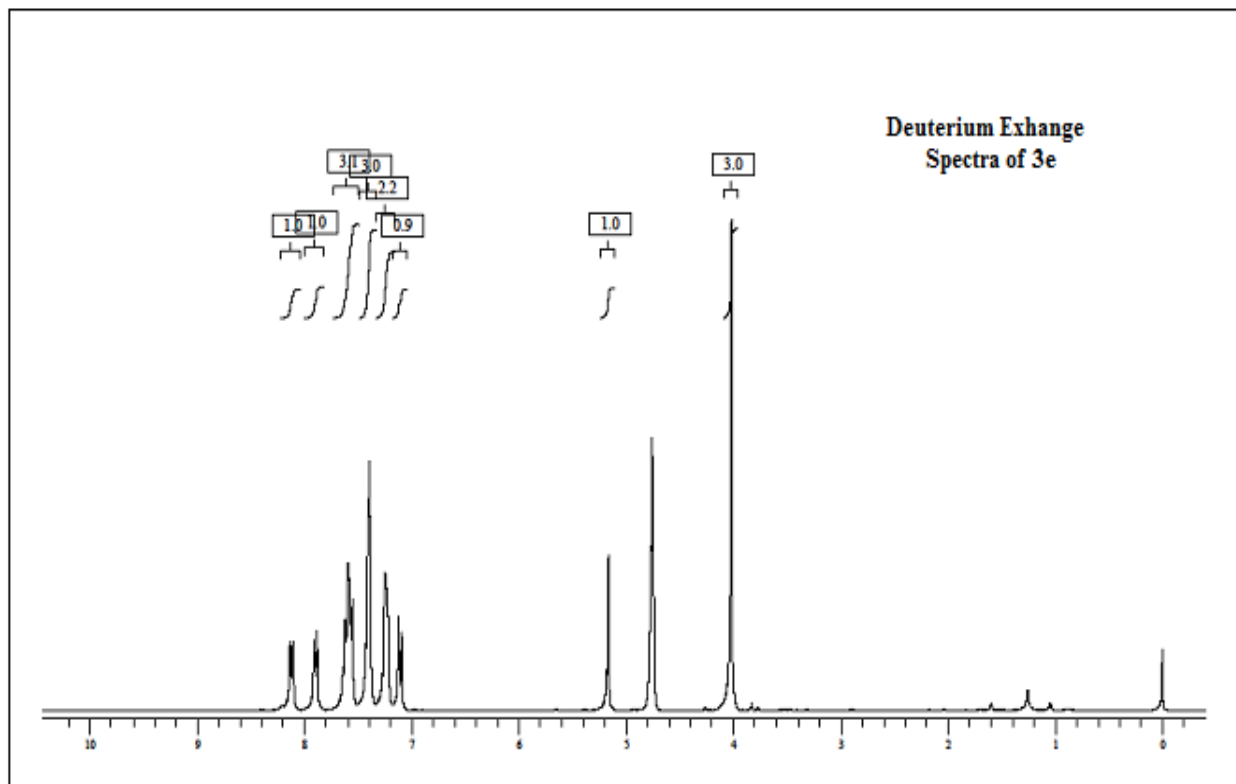

### **X-ray crystallographic data**

X-ray data for the compounds **3h** and **6** were collected at room temperature using a Bruker Smart Apex CCD diffractometer with graphite monochromated MoK $\alpha$  radiation ( $\lambda=0.71073\text{\AA}$ ) with  $\omega$ -scan method.<sup>1</sup> Preliminary lattice parameters and orientation matrices were obtained from four sets of frames. Unit cell dimensions were determined using 5195 reflections for **3h** data and 6764 reflections for **6** data. Integration and scaling of intensity data were accomplished using SAINT program.<sup>1</sup> The structures were solved by Direct Methods using SHELXS97<sup>2</sup> and refinement was carried out by full-matrix least-squares technique using SHELXL97.<sup>2</sup> Anisotropic displacement parameters were included for all non-hydrogen atoms. All H atoms were positioned geometrically and treated as riding on their parent C atoms, with C-H distances of 0.93--0.97  $\text{\AA}$ , and with  $U_{\text{iso}}(\text{H}) = 1.2U_{\text{eq}}(\text{C})$  or  $1.5U_{\text{eq}}$  for methyl atoms.

#### **Crystal data for 3h (CCDC 938721):**

$\text{C}_{21}\text{H}_{15}\text{N}_2\text{O}_2\text{Cl}$ ,  $M = 362.80$ , colorless block,  $0.38 \times 0.22 \times 0.18 \text{ mm}^3$ , orthorhombic, space group  $P2_12_12_1$  (No. 19),  $a = 8.8826(8)$ ,  $b = 9.7822(8)$ ,  $c = 20.8708(18) \text{ \AA}$ ,  $V = 1813.5(3) \text{ \AA}^3$ ,  $Z = 4$ ,  $D_c = 1.329 \text{ g/cm}^3$ ,  $F_{000} = 752$ , CCD area detector, Mo-K $\alpha$  radiation,  $\lambda = 0.71073 \text{ \AA}$ ,  $T = 294(2)\text{K}$ ,  $2\theta_{\text{max}} = 52.0^\circ$ , 18905 reflections collected, 3547 unique ( $R_{\text{int}} = 0.0208$ ). Final  $\text{Goof} = 0.986$ ,  $R_1 = 0.0324$ ,  $wR_2 = 0.0858$ ,  $R$  indices based on 3369 reflections with  $I > 2\sigma(I)$  (refinement on  $F^2$ ), 240 parameters,  $\mu = 0.228 \text{ mm}^{-1}$ , absolute structure parameter =  $0.00(6)$ .<sup>3</sup>

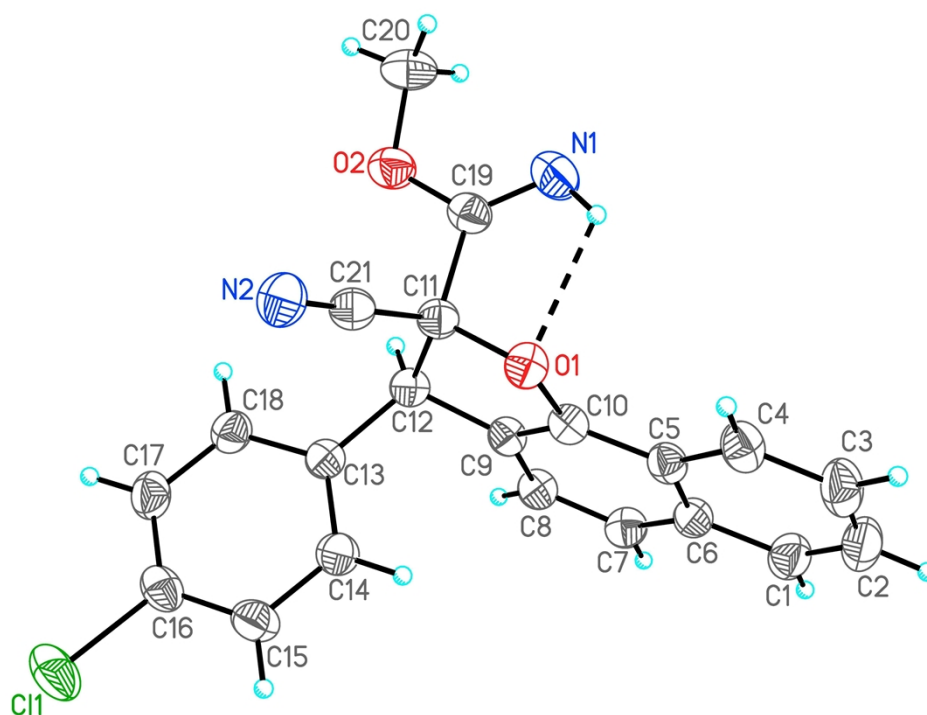

The ORTEP diagram of **3h** with the atom-numbering scheme. Displacement ellipsoids are drawn at the 30% probability level and H atoms are shown as small spheres of arbitrary radius. An intramolecular N-H $\cdots$ O hydrogen bond is indicated by dotted lines [bond distances N1-H1, H1N $\cdots$ O1, N1 $\cdots$ O1 and angle  $\angle$ N1-H1N $\cdots$ O1 parameters are 0.90 Å, 2.22 Å, 2.720(2)Å and 114°, respectively].

**Crystal data for 6 (CCDC 938722):**

C<sub>22</sub>H<sub>20</sub>N<sub>2</sub>O<sub>3</sub>,  $M = 360.40$ , colorless needle,  $0.43 \times 0.21 \times 0.14$  mm<sup>3</sup>, orthorhombic, space group *Pbca* (No. 61),  $a = 15.9828(14)$ ,  $b = 6.8208(6)$ ,  $c = 34.232(3)$  Å,  $V = 3731.9(6)$  Å<sup>3</sup>,  $Z = 8$ ,  $D_c = 1.283$  g/cm<sup>3</sup>,  $F_{000} = 1520$ , CCD area detector, Mo-K $\alpha$  radiation,  $\lambda = 0.71073$  Å,  $T = 293(2)$ K,  $2\theta_{\max} = 50.0^\circ$ , 32809 reflections collected, 3277 unique ( $R_{\text{int}} = 0.0386$ ). Final  $\text{GooF} = 1.049$ ,  $R_I = 0.0383$ ,  $wR_2 = 0.0986$ ,  $R$  indices based on 2964 reflections with  $I > 2\sigma(I)$  (refinement on  $F^2$ ), 254 parameters,  $\mu = 0.086$  mm<sup>-1</sup>.

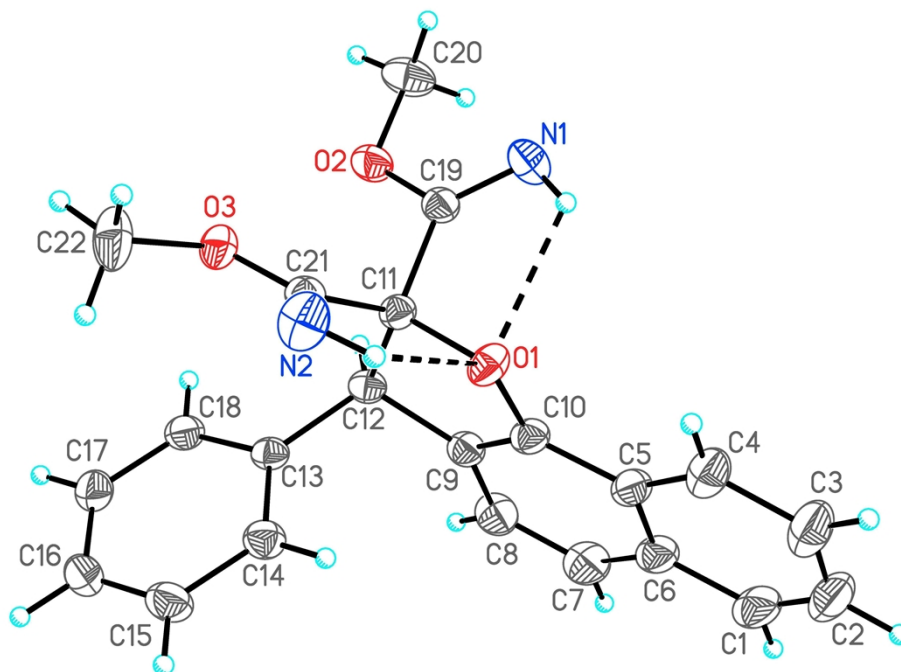

The ORTEP diagram of **6** with the atom-numbering scheme. Displacement ellipsoids are drawn at the 30% probability level and H atoms are shown as small spheres of arbitrary radius. The two intramolecular N-H $\cdots$ O hydrogen bonds are indicated by dotted lines [bond distances N-H, H $\cdots$ O, N $\cdots$ O and angle  $\angle$ N-H $\cdots$ O parameters are 0.87 Å, 2.26 Å, 2.722(2)Å, 116° for N1-H1N $\cdots$ O1 and 0.91 Å, 2.21 Å, 2.707(2)Å, 114° for N2-H2N $\cdots$ O1, respectively].

Hydrogen bondings are shown by using PLATON<sup>4</sup>. Crystallographic data for these compounds (**3h** and **6**) can be obtained free of charge at [www.ccdc.cam.ac.uk/conts/retrieving.html](http://www.ccdc.cam.ac.uk/conts/retrieving.html) [or from the Cambridge Crystallographic Data Centre (CCDC), 12 Union Road, Cambridge CB2 1EZ, UK; fax: +44(0) 1223 336 033; email: [deposit@ccdc.cam.ac.uk](mailto:deposit@ccdc.cam.ac.uk)].

## **References**

1. SMART & SAINT. Software Reference manuals. Versions 6.28a & 5.625, Bruker Analytical X-ray Systems Inc., Madison, Wisconsin, U.S.A., 2001.
2. G. M. Sheldrick, SHELXS97 and SHELXL97, Programs for crystal structure solution and refinement; University of Gottingen: Germany, 1997.
3. H. D. Flack, *Acta Cryst.*, 1983, *A39*, 876-881.
4. A. L. Spek, Single crystal structure validation with the program PLATON, *J. Appl. Cryst.*, 2003, **36**, 7-13
